RESEARCH ARTICLE

# Local ecological knowledge and its relationship with biodiversity conservation among two *Quilombola* groups living in the Atlantic Rainforest, Brazil

Bruno Esteves Conde<sup>1</sup>, Tamara Ticktin<sup>2</sup>, Amanda Sureus Fonseca<sup>3</sup>, Arthur Ladeira Macedo<sup>4</sup>, Timothy Ongaro Orsi<sup>5</sup>, Luciana Moreira Chedier<sup>1</sup>, Eliana Rodrigues<sup>6</sup>, Daniel Sales Pimenta<sup>1\*</sup>

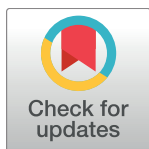

**1** Departamento de Botânica, Universidade Federal de Juiz de Fora, Juiz de Fora, Minas Gerais, Brazil, **2** Botany Department, University of Hawai'i at Mānoa, Honolulu, Hawaii, United States of America, **3** Departamento de Ciências Biológicas, Centro de Ensino Superior de Juiz de Fora, Juiz de Fora, Minas Gerais, Brazil, **4** Departamento de Química Orgânica, Universidade Federal Fluminense, Niterói, Rio de Janeiro, Brazil, **5** Departamento de Geografia, Universidade Federal de Juiz de Fora, Juiz de Fora, Minas Gerais, Brazil, **6** Departamento de Ciências Ambientais, Universidade Federal de São Paulo, Diadema, São Paulo, Brazil

\* [bcondebio@hotmail.com](mailto:bcondebio@hotmail.com)

**OPEN ACCESS**

**Citation:** Conde BE, Ticktin T, Fonseca AS, Macedo AL, Orsi TO, Chedier LM, et al. (2017) Local ecological knowledge and its relationship with biodiversity conservation among two *Quilombola* groups living in the Atlantic Rainforest, Brazil. PLoS ONE 12(11): e0187599. <https://doi.org/10.1371/journal.pone.0187599>

**Editor:** Ulrich Melcher, Oklahoma State University, UNITED STATES

**Received:** July 14, 2017

**Accepted:** October 23, 2017

**Published:** November 28, 2017

**Copyright:** © 2017 Conde et al. This is an open access article distributed under the terms of the [Creative Commons Attribution License](https://creativecommons.org/licenses/by/4.0/), which permits unrestricted use, distribution, and reproduction in any medium, provided the original author and source are credited.

**Data Availability Statement:** All relevant data are within the paper and its Supporting Information files.

**Funding:** This study was funded by the Programa de Pós-Graduação em Ecologia of Universidade Federal de Juiz de Fora, the Coordenação de Aperfeiçoamento Pessoal de Nível Superior (CAPES), Conselho Nacional de Desenvolvimento Científico e Tecnológico (CNPq), and the University of Hawaii at Manoa. The funders had no role in

## Abstract

Information on the knowledge, uses, and abundance of natural resources in local communities can provide insight on conservation status and conservation strategies in these locations. The aim of this research was to evaluate the uses, knowledge and conservation status of plants in two Quilombolas (descendants of slaves of African origin) communities in the Atlantic rainforest of Brazil, São Sebastião da Boa Vista (SSBV) and São Bento (SB). We used a combination of ethnobotanical and ecological survey methods to ask: 1) What ethnobotanical knowledge do the communities hold? 2) What native species are most valuable to them? 3) What is the conservation status of the native species used? Thirteen local experts described the names and uses of 212 species in SSBV (105 native species) and 221 in SB (96 native species). Shannon Wiener diversity and Pielou's Equitability indices of ethnobotanical knowledge of species were very high (5.27/0.96 and 5.28/0.96, respectively). Species with the highest cultural significance and use-value indexes in SSBV were *Dalbergia hortensis* (26/2.14), *Eremanthus erythropappus* (6.88/1), and *Tibouchina granulosa* (6.02/1); while *Piptadenia gonoacantha* (3.32/1), *Sparattosperma leucanthum* (3.32/1) and *Cecropia glaziovii* (3.32/0.67) were the highest in SB. Thirty-three native species ranked in the highest conservation priority category at SSBV and 31 at SB. *D. hortensis* was noteworthy because of its extremely high cultural importance at SSBV, and its categorization as a conservation priority in both communities. This information can be used towards generating sustainable use and conservation plans that are appropriate for the local communities.

study design, data collection and analysis, decision to publish, or preparation of the manuscript.

**Competing interests:** The authors have declared that no competing interests exist.

## Introduction

Brazil is one of the world's megadiverse countries, and the Atlantic rainforest, which stretches from the northeastern to the southern regions of the country, is the most biodiverse biome of Brazil, with up to 476 plant species found in one hectare [1]. Unfortunately, the Atlantic rainforest is also one of the most threatened forest types in the world, with nearly 90% of its original area devastated [2]. As is the case with the majority of Brazilian protected areas [3], the Atlantic Rainforest is also home to many traditional communities—those that have lived in one location for a long period of time, such as the *Quilombolas*. According to the Living Report of World Wide Fund for Nature [4], 90% of tropical forests worldwide are not under formal protection and millions of people living both inside and outside of reserves rely on their resources [5].

The *Quilombolas* are descendants of slaves of African origin who came to Brazil during the colonial (1530–1815), united kingdom (1815–1822) and empire (1822–1889) periods. Some of these slaves fled the farms where they were exploited, organizing communities of refugees, called *Quilombolas*, in the local forests. Since that time, the *Quilombolas* have lived in villages where they have made a living from agriculture and use of forest resources. Like other traditional communities, over time they have developed detailed local ecological knowledge systems (LEK) [6, 7]. LEK systems are knowledge practice and belief systems about the relationships of living beings, including humans, with one another and with their environments. LEK is developed through the process of observation and experimentation and is passed down through generations [8, 9]. Research outside of Brazil has shown that communities of freed or escaped slaves, also known as maroons, have high levels of knowledge of plants [10], and strong conservation practices for their natural resources [11].

It is important for communities, such as the *Quilombolas*, who continue to depend on the local environment as a primary source of resources, to develop the means to maintain and preserve local species. Understanding LEK, including ethnobotanical knowledge and natural resource use strategies, is critical to developing strategies for conservation [12]. Conservation projects that do not include communication with and/or participation of local communities who use the resources can be problematic. In addition, the loss of local knowledge and practices may compromise not only cultural knowledge but also local biodiversity [13]. Surveys of useful plant resources can provide information to help evaluate conservation status and the potential for sustainable use [14]. In Brazil, little is known about the knowledge, use, and conservation of resources of *Quilombolas* communities. Crepaldi and Peixoto [15] documented species abundance in forests and how they were managed in a *Quilombola* community in the state of Espírito Santo, Brazil, but beyond this study little information is available. Similarly, França [16], documented the species in Campinho da Independência, Paraty/RJ, and Avila, Zank [17] the species of three communities in Santa Catarina.

This work focused on two *Quilombolas* communities in the Atlantic forest of Minas Gerais state in Brazil to address the following questions: 1) What ethnobotanical knowledge do the communities hold? 2) What are native plant species most valuable to them? 3) What is the conservation status of the native species used? By developing a list of local forest species and their conservation status, we also aimed to identify species at risk [18], and therefore generate some of the information needed for sustainable management plans.

## Methods

### Study sites

We carried out our research in two *Quilombolas* communities located inside the Atlantic Rainforest in Minas Gerais state of Brazil: São Sebastião da Boa Vista (SSBV) (21°31'0.24" S e 43°

39° 30. 26" W) and São Bento (SB) (21° 33' 39.33 S e 43° 38' 59. 94" W) (Fig 1). The vegetation in these communities range from grassland to forest to *Eucalyptus* plantations, as well as farms with crops and cattle. Historically, these farms were run by slave owners, and the *Quilombolas* are descendants of those slaves. Today, most of the inhabitants continue to raise crops and cattle on their land, but some young people work as wage laborer in eucalyptus farms in the surrounding areas.

Since 2010 both communities have had linkages with the Geosciences department/Geography and Botany department/ICB at the Federal University of Juiz de Fora. The communities of SSBV and SB provide excellent locations to study local ecological knowledge as they have been partially isolated for many years, exclusively using the natural resources around them, and so and have developed much knowledge about the use of the forest surrounding the communities.

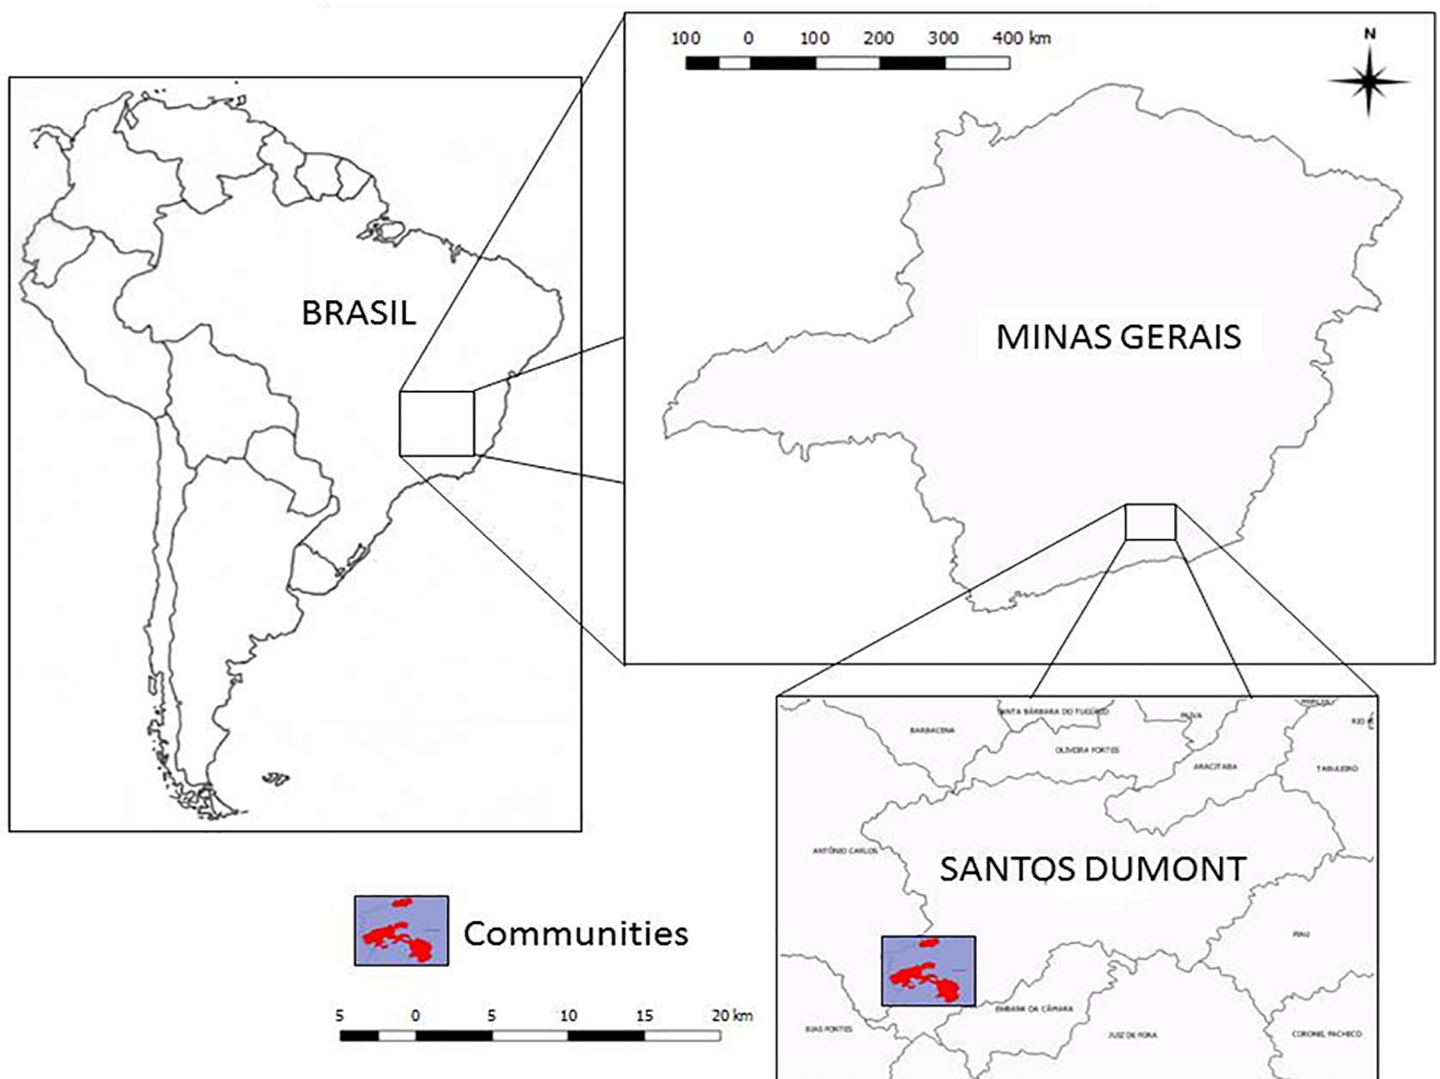

**Fig 1. Localization of the communities studied, São Sebastião da Boa Vista (SSBV) and São Bento (SB).** Santos Dumont city, Minas Gerais state/ Brazil.

<https://doi.org/10.1371/journal.pone.0187599.g001>

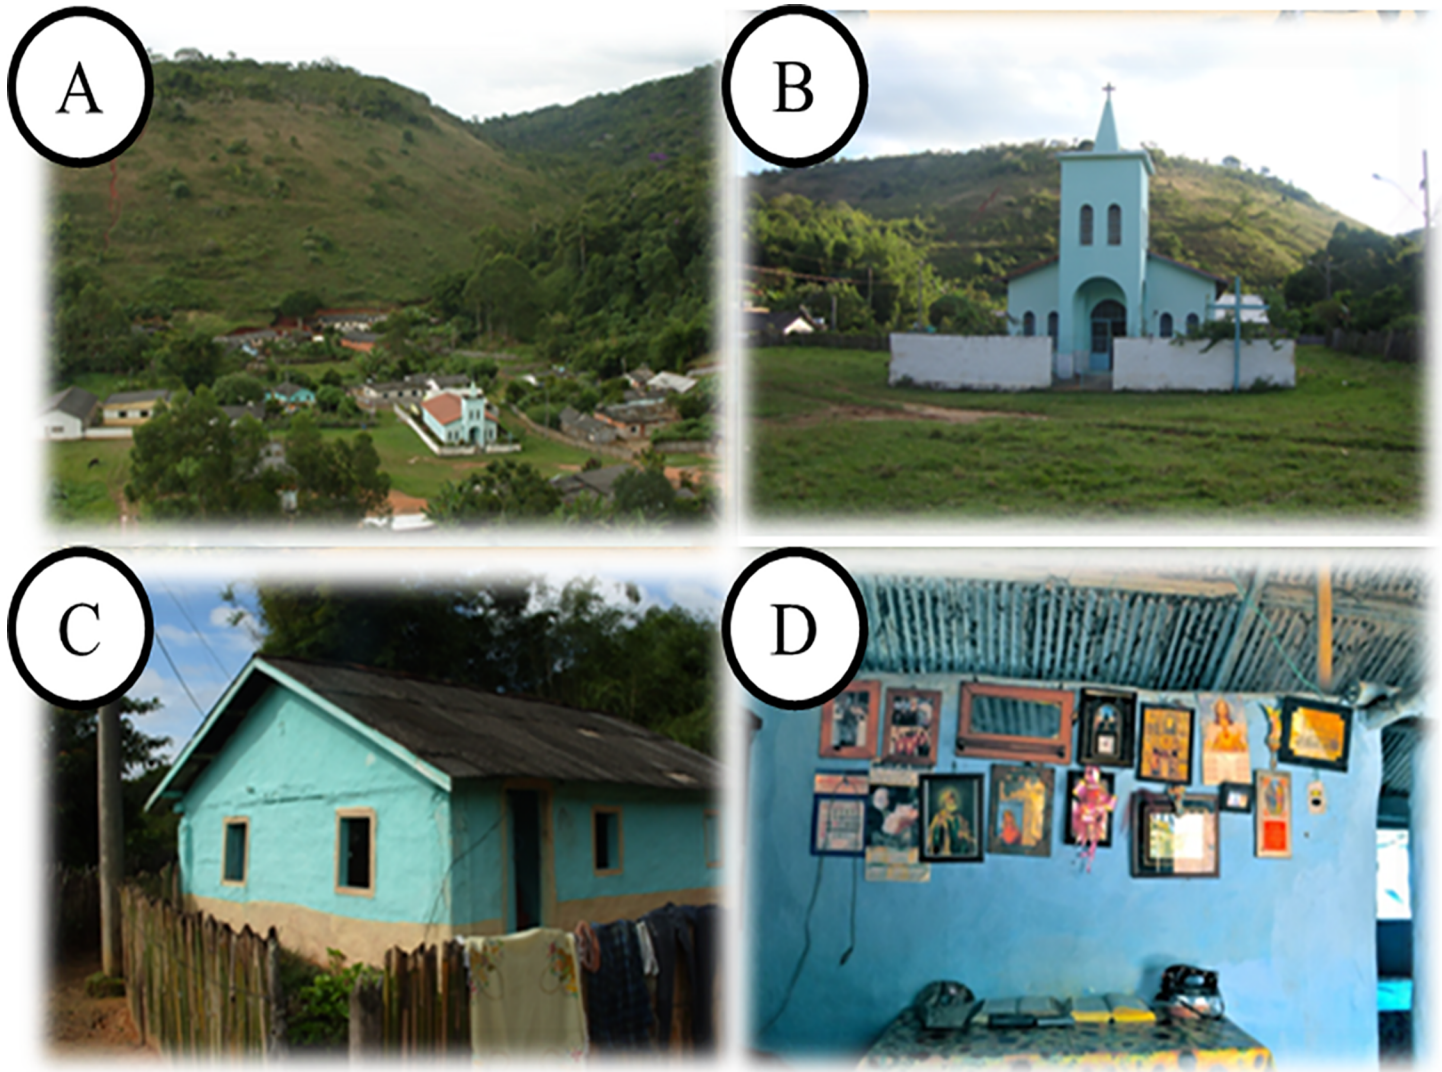

**Fig 2. São Sebastião da Boa Vista community.** A: View about a community; B: Church of São Sebastião da Boa Vista; C and D: Common style house in the community.

<https://doi.org/10.1371/journal.pone.0187599.g002>

The size of the communities' territories are: 130 hectares (SSBV) and 8000 hectares (SB). At SSBV, houses are located at the community center, surrounding the church in a radius of at most 300 m. Today the community has 36 houses and 98 inhabitants. At SB, houses are further away from each other, but the church is considered the community center and the meeting point of villagers. Presently, the community has 20 houses and 85 inhabitants; houses are scattered around the woods in a radius of up to 6 km and they have restricted access by trails (Figs 2 and 3).

Catholic churches are the main places of worship for the communities; however, elements of African religions are present, demonstrating religious syncretism.

### Ethnography, consent and ethical approval

Ten trips were made to each community between March and December of 2012. These trips included home visits to all houses in each community for informal interviews with

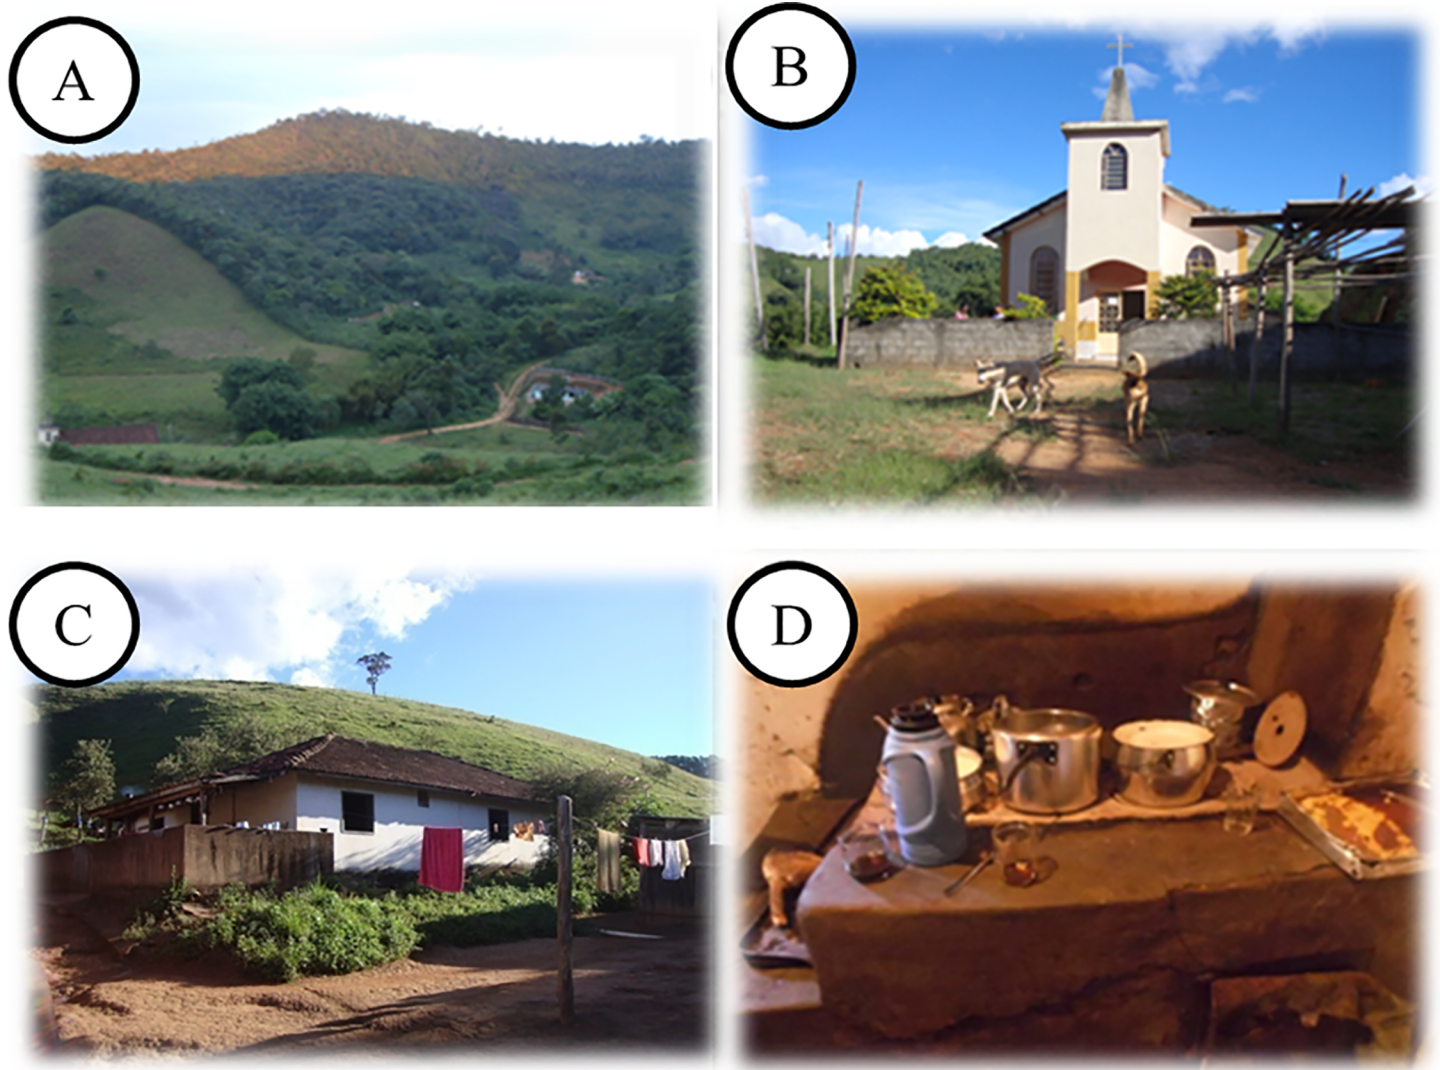

**Fig 3. São Bento community.** A: View of the community; B: Church of São Bento; C and D: Common style house in the community.

<https://doi.org/10.1371/journal.pone.0187599.g003>

the inhabitants and participant observation [19]—observing and participating in daily activities with the residents.

Home visits were carried out together with a key informant, who contributed actively to the research [20]. The main discussions were about life histories, local daily problems, collective life, and health. We also which community members were experts in health and/or knowledge of plants [21].

At the end of this stage, participants signed the free, prior and informed consent agreement provided by the Brazilian Ministry of Culture.

Permission to conduct this study was obtained from “Instituto do Patrimônio Histórico e Artístico Nacional” (IPHAN—National Institute of Historic and Artistic Patrimony) by permit n° 01450.010839/2012-62 (S1 Appendix). To obtain this permission, a meeting with all the community members, recorded in the minutes of the residents’ association, were made at each *Quilombola*, when all steps of the work were explained, prevising the participation of citizens

of all age groups. In these meetings the president of the residents’ association signed a Consent Form provided by IPHAN on behalf of the whole community, authorizing the research at the *Quilombolas* and with their citizens. After that, these Consent Forms were sent to IPHAN and the permission was obtained.

### Collection of ethnobotanical data

Ethnobotanical data were collected through interviews with local experts, where the snow ball method [19] was employed, and local experts indicated other possible plant experts. A total of 13 local experts were identified. The group in SSBV was of 7 experts (2 men and 5 women) and in SB was of 6 experts (2 men and 4 women). The age of these specialists ranged from 26 to 84 years, and their social occupations included traditional cooks, builders, craftsmen, spiritual healers, lumberjack and/or bushman (Table 1).

Interviews using semi-structured questionnaires were carried out with local experts [22] where they were asked about the use of plants for all purposes (Table 2).

To triangulate the information collected in interviews, focus group discussions were carried out with the whole community in day-long meetings (1 in each community). We directly invited all households to attend (by going door to door). The focus group in SSBV was made up of 18 teenagers (12–18 years old; ten female and eight male), 16 adults (over 18 and less than 60 years old; nine women and seven men) and nine elders (over 60 years old; five women and four men). In SB there were 20 teenagers (15 female and five male), ten adults (seven women and three men) and eight elders (six women and two men). The ages ranged from 18 to 66 in SSBV and 18 to 75 in SB. Focus group discussions focused on the vernacular names of plants and their use categories (Table 2). Pictures or *in vivo* specimens were presented and participants openly discussed the plants used. All participants present had the opportunity to participate. Focus groups lasted up to one hour.

### Collection and identification of plant specimens

After obtaining ethnobotanical data, fertile species were collected *in vivo* [24] by the “walk in the woods method” [25] with local experts. Voucher specimens were prepared and identified by experts from Universidade Federal de Juiz de Fora (UFJF) and partner specialists and vouchers were deposited in Leopoldo Krieger Herbarium (CESJ). Scientific names and families of species were checked using theplantlist.org

In cases where the flowering period did not coincide with the field visits, non-fertile species were collected but were identified by comparison with samples of CESJ Herbarium and with image records of Virtual Herbarium of Muséum National d’Historie Naturelle, Royal Botanical Gardens, and Missouri Botanical Garden. For those plant species for which it was not possible

**Table 1. Gender, age, and number of local specialists with knowledge of different plant use categories in São Sebastião da Boa Vista (SSBV) and São Bento (SB).**

| Community                  | Gender |   | Specialty categories |    |    |    |    |    |    | Average age ± SD |
|----------------------------|--------|---|----------------------|----|----|----|----|----|----|------------------|
|                            | M      | F | MP                   | TC | Bu | Cr | SH | Lu | Bm |                  |
| São Sebastião da Boa Vista | 2      | 5 | 7                    | 2  | 2  | 1  | 2  | 2  | 2  | 58.7 ± 9.7       |
| São Bento                  | 3      | 3 | 5                    | 2  | 2  | 1  | 2  | 2  | 2  | 67.1 ± 3.9       |
| Total                      | 5      | 8 | 12                   | 4  | 4  | 2  | 4  | 4  | 4  | -                |
| Average of the averages    | -      | - | -                    | -  | -  | -  | -  | -  | -  | 62.9             |

(M) = Male; (F) = Female; (MP) = Knowledge of medicinal plants; (TC) = Traditional cooks; (Bu) = Builders; (Cr) = Craftsman; (SH) = spiritual healers, that have supernatural power to cures and other spells; (Lu) = Lumberjack; (Bm) = Bushman = main collectors of raw forest material.

<https://doi.org/10.1371/journal.pone.0187599.t001>

**Table 2. Plant uses by *Quilombolas* of São Sebastião da Boa Vista (SSBV) and São Bento (SB)—listing by categories adapted from Galeano [23].**

| Use category | Use type                                          |
|--------------|---------------------------------------------------|
| Food         | Heart of palm                                     |
|              | Leaves, fruits, and flowers eaten raw or cooked   |
|              | Fruits used for production of alcoholic beverages |
|              | Edible fruits                                     |
|              | Spices                                            |
| Building     | House found                                       |
|              | Flooring                                          |
|              | Pillars                                           |
|              | Crafting                                          |
|              | Thatched roof                                     |
| Fuel         | Fire production (for multiple purposes)           |
| Medicinal    | Medicines                                         |
| Ornamental   | Grown for ornamentation                           |
| Ritualistic  | Bath to discharge the body of bad energy          |
|              | Protect the house                                 |
| Technology   | Sarong making                                     |
|              | Fishing tools                                     |
|              | Furniture                                         |
|              | Cable tools in general                            |
|              | Stakes and fences                                 |
|              | Handicrafts for decoration                        |
|              | Kitchenware                                       |

<https://doi.org/10.1371/journal.pone.0187599.t002>

to collect samples, the checklist method was performed [22]. Botanical species photographs from the Ethnobotanical Laboratory of UFJF collection were shown to interviewees so that they could confirm which ones they had cited in the surveys and focus groups.

### Evaluation of origin and conservation status of plants used in the communities

Information about the species named and collected was searched for in the Flora Brasiliensis [26], The Botanical List of Brazilian Species (Reflora) and the Native Species Manual [27]. For evaluation of conservation status, only native species were considered. For Atlantic rainforest species that are harvested, information on the conservation status and threats were searched for using the following databases: Ministério do Meio Ambiente, Biodiversitas Foundation and International Union for Conservation Nature.

### Data analyses

To evaluate ethnobotanical knowledge homogeneity and diversity of the study communities, Pielou's Equitability index (EI) and Shannon-Wiener's biological diversity index (BDI) were used [28]. These indices, commonly used in ecology, have been adapted to ethnobotany to evaluate the uniformity and diversity of ethnobotanical knowledge respectively, of a particular community. These indices were calculated based on every species of the ethnobotanical collection in both communities; native and exotic species were both included. The software PAST v.134 [29] and the equations below were used:

Shannon-Wiener Index

$$H' = -\sum Pi \times \log Pi$$

Where:

$$Pi = n^i / N$$

$$H' = BDI$$

$n^i$  = only citations per species only from the interviews

$N$  = total of citations

Pielou's Equitability index:

$$J' = \frac{H'}{H'_{max}}$$

$$BDI = H'$$

$H'_{max}$  = (natural base logarithm) of total species number

These indices were also compared with those found from other studies in Brazil.

To measure the importance of each native species, we used the Cultural Significance index (CSI) [30]:

$$CSI = \sum (i \times e \times c) \times CF$$

$i$  = species management (ranging between 1 and 2. Being 2 = cultivated or managed)

$e$  = preferential use (ranging between 1 and 2. Being 2 = preferential for a particular use)

$c$  = use frequency (ranging between 1 and 2. Being 1 for rarely cited—cited by less than two people or under 10% of citation)

$CF$  = correction factor (citations of species  $x$ /citations of the most cited species)

\* ( $i \times e \times c$ ) = must be calculated for each use category

To assess the conservation status of native forest plant species used by SSBV and SB communities, we adapted the Conservation Priority Index (CPI) [18], which considers the following criteria: sampled density, risk based on collection type, local importance and diversity of uses. The forests area for each community was large (40.000 m<sup>2</sup> in SSBV and 150.000 m<sup>2</sup> in SB), therefore plots were established to obtain species densities. As suggested by Espírito-Santo, Shimabukuro [31], 10 plots of 10 m x 10 m (totalizing 0.1 hectare) were established in the forests surrounding each community. Plot locations were chosen by “preferential sampling” [32], where local experts identified the sites with the highest collection pressure (Fig 4). These local experts were invited to participate in the “walk in the wood” method [25] through the selected plots, where they named known and useful species. All the sampled species [15] were collected *in vivo* [24] and an image record was produced [33] for subsequent identification by comparison with CESJ Herbarium specimen [22].



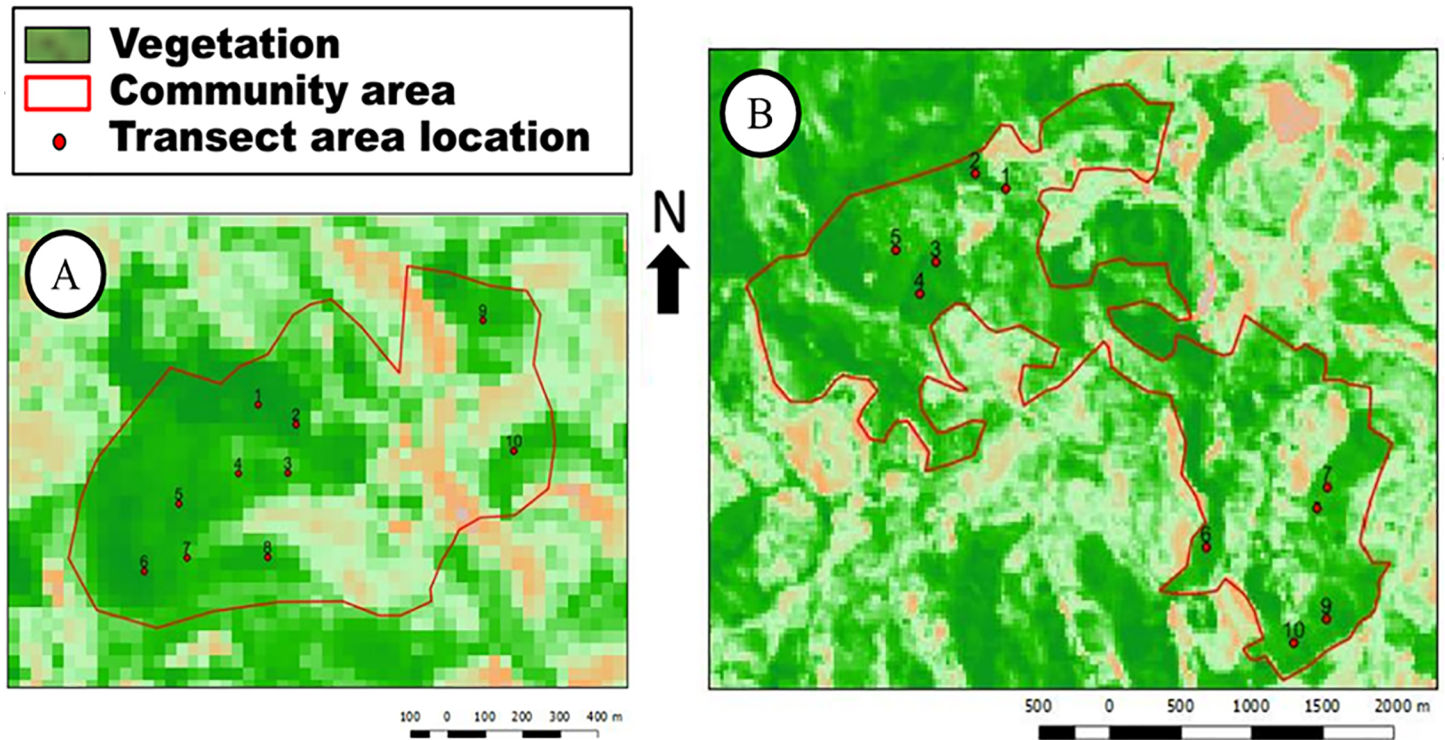

**Fig 4. Aerial overview of the communities.** A: São Sebastião da Boa Vista; B: São Bento.

<https://doi.org/10.1371/journal.pone.0187599.g004>

The CPI was scored according to [Table 3](#) and calculated using the formula below:

$$CPI = 0.5(B) + 0.5(RU)$$

B = Biological Value

RU = Risk of use

Where:

$B = Dr \times 10$

$Dr = (N/ni) \times 100$

N = individuals of the x species

ni = individuals of all sampled species

$$RU = 0.5(C) + 0.5(U) \times 10$$

(C) Collection Risk = Points attributed per collected botanical parts

(U) Use-value = determined by the highest value between L and Div

**Table 3. Scoring criteria used to determine conservation priority species.** Adapted from [18].

|                                                             | Criteria                                                                                                                           | Score    |
|-------------------------------------------------------------|------------------------------------------------------------------------------------------------------------------------------------|----------|
| (Dr) Relative density                                       | Occurrence between 0 and 1, then is considered too low                                                                             | 10       |
|                                                             | Occurrence between 1.1 and 3.5, then is considered low                                                                             | 7        |
|                                                             | Occurrence between 3.6 and 7, then is considered average                                                                           | 4        |
|                                                             | Occurrence above 7                                                                                                                 | 1        |
| (C) Collection risk based on the botanical part collected   | Removal of specimen, of descendants, excluding possibility of species perpetuation                                                 | 10       |
|                                                             | Removal of perennial structures without death, but actively influencing vegetative growth or flowering and perpetuation of species | 7        |
|                                                             | Ex: botanicals structures that fall naturally and periodically                                                                     |          |
|                                                             | Removal of permanent aerial parts without death and influencing only on vegetative growth and energy production                    | 4        |
|                                                             | Removal of transitory aerial parts without direct influence on species life cycle.                                                 | 1        |
| (L) Use location based on the reference frequency           | For over than 20% of population, its use is considered high                                                                        | 10       |
|                                                             | Between 10 and 20%, its use is considered moderately high                                                                          | 7        |
|                                                             | Up to 10%, its use is considered moderately low                                                                                    | 4        |
|                                                             | Only mentioned in interviews                                                                                                       | 1        |
| (Div) Diversity or plurality of use assigned to the species | For each use, add 1.42 to Div value                                                                                                | Up to 10 |

<https://doi.org/10.1371/journal.pone.0187599.t003>

Analyzed species were categorized into three groups:

**Category 1** (species with score  $\geq 85$ ); they have conservation priority and should not be collected until appropriate precautions or for further conservation plans are implemented;

**Category 2** (species with score between 85 and 60); they are suitable for moderate collection;

**Category 3** (species with score  $\leq 60$ ); they are suitable for collection.

As another indicator of potential pressure on native species, the Use-Value Index (UVI) [25, 34] was calculated with the formula:

$$UVI = \sum U/n$$

Where:

U = Number of mentioned uses of species X.

n = Total number of interviewees.

Lucena, Lucena [35] state that CPI is the most effective index to identify locally rare and impacted species, however, UVI can be additionally used to identify the most known and used species.

Finally, we classified species into their ecological succession stage by dividing them into three groups, according to the classification of Gandolfi, Leitão Filho [36] 1) Pioneer (species that develop in clearings, in forest edges or in the open, dependent on light and not occurring generally in the understory); 2) Early secondary (species that develop in small clearings in the understory under conditions of some shading and can also occur in areas of old clearings); 3) Late secondary (species that develop exclusively in the permanently shaded understory, including small or large tree species that develop slowly and may reach the canopy or are emerging; and 4) Climax (species that have slow growth, germinate and develop in the shade, and produce large seeds).

To compare our ethnobotanical indices to those in the literature, we searched for Ph.D. thesis and Master dissertations on Biblioteca Digital Brasileira de Teses e Dissertações (<http://bdtd.ibict.br/vufind/>) and for papers on Scientific Electronic Library Online (<http://www.scielo.org/php/index.php>) and Scopus (<http://www.scopus.com/home.url>) databases.

## Results and discussion

### Sociocultural characteristics

Based on experts at both communities, knowledge about local plants was predominantly among the older generation, with a mean of age of  $58.7 \pm 9.7$  years in SSBV and  $67.1 \pm 3.9$  in SB of the experts interviewed. Lima, Silva [37], Hanazaki, Tamashiro [38] and Galeano [23] have found similar results. This may indicate expertise takes many years, or that knowledge may be decreasing in the younger generations [23]. In our focus group discussions, it was noted that the decreasing isolation of these communities has resulted in changes in lifestyle, through the incorporation of urban elements into the local culture. This is also evidenced by the increase of households with TV and telephones and the education of 7 teenagers from SSBV and 5 from SB in Santos Dumont city. Participants in the focus group discussions also commented that young people are no longer interested in learning traditional knowledge.

In terms of gender, there were more female than male experts (Table 1), and all the women are medicinal plant experts and 4 of them are traditional cooks. All male experts are lumberjacks, bushman and builders—these knowledge categories are exclusive to men. These data demonstrate a social allocation of labor as the men are responsible for resource extraction from the forest and other jobs that require heavy labor, such as construction. Women are responsible for food preparation and health of their families. These results coincide with other studies of *Quilombola* communities [39, 40].

In terms of religion, 100% of the members of both communities are Catholic, demonstrating the great influence of Catholicism in historical and social process of the formation of Brazilian *Quilombola* communities', as pointed out by Santos [41]. Historically this influence occurred due to the presence of large estates which were producers of coffee and milk, and where farmers imposed European culture on their slaves. This was confirmed through reports in both communities, that religion was one of the conditions imposed on them to keep the local peace. According to participants, in the case of SSBV, the most important historic milestone was the construction of the Church with the local farm owners help, in 1930 and the existence of a slave known as "Pai Tudo" (which translates to "father of everything"), who died in the same decade. He was considered a healer, spiritual healer, and sorcerer, who made magic for good and for evil and a local disseminator of religious and ethnobotanical knowledge. This highlights the religious syncretism and cultural changes that occurred as a result of imposed religious elements [42]. The local historic milestone in SB is similar to that of SSBV, where the Catholic Church was also constructed by farm owners.

### Ethnobotanical data

A total of 212 useful species were recorded from SSBV and 221 from SB. This included 105 and 96 native species from the Atlantic forest, respectively, totaling 139 native species (out of a total of 299) (Table 4). The substantial proportion of exotic species demonstrates the influence of diverse cultures and ethnic groups on plant knowledge formation at both communities.

In general, those plants used in the two communities were used in the same ways in both places. However, a few species had different uses, such as *Dalbergia hortensis* (used for medicinal, construction, ritualistic and technological uses in SSBV and only technological uses in SB) and *Merostachys* sp<sup>1</sup>. (employed in ornamental, construction, fuelwood and technological uses

in SSBV and only used for construction in SB). A possible explanation is that they were influenced by different farmers in their respective areas, which possibly resulted in different knowledge about the same plants. Although *Quilombolas* knowledge includes knowledge brought from Africa, it also includes knowledge learned from Amerindians and Europeans living in Brazil. This influence can be observed in the vernacular names of plants, which are distinct in many cases between the two communities (Table 4).

Medicinal and technological uses were the most important uses in both communities (Fig 5). The predominance of plants used for medicinal purposes was also described for other *Quilombolas* communities, including Campinho da Independência in Paraty/RJ, Brazil [16] and in Espírito Santo state, Brazil [15], both in areas of Atlantic Rainforest. Hanazaki, Souza [43] similarly described the main use of plants for medicinal purposes for rural communities in the Boundaries of Carlos Botelho State Park in São Paulo, Brazil. In this study construction/technological uses included construction of houses and furniture, manufacturing of handles, canoes, fence posts and wooden wagons. This is similar to another Atlantic forest community (Rio Formoso/PE, Brazil) where technology and medicine were identified as the two most important use categories [44].

We found that herbaceous plants are predominant among medicinal species, and that leaves are the plant part most commonly collected from herbaceous species. Trees were mostly employed for technological uses and therefore stems were the plant part most commonly used. In Rio Formoso, the plant part most frequently collected part was wood (78.5%), followed by fruit, bark, resin, inner bark, seed, leaf, and flowers [44]. Albuquerque and Andrade [45], Oliveira, Lins Neto [46] and Meyer, Quadros [47] showed the predominant use of stems and trees in the Caatinga; however, it is important to note that this biome has different characteristics to the Atlantic Rainforest, as it is much drier.

The Shannon-Wiener biological diversity index and Equitability index were 5.14 and 0.96 respectively for SSBV and 5.20 and 0.96 for SB. These are considered high according to [29] and as compared to other studies in Brazil (Table 5). These values may indicate homogeneity of ethnobotanical knowledge. However, Meyer, Quadros [47] state that high values can also demonstrate a common ethnobotanical knowledge origin of plant knowledge. This is consistent with the fact that among the 63 species that were used in both communities, 42 species have the same vernacular name (Table 4). The high evenness may also be a result of the fact that only experts were interviewed in each community. However, our value for the diversity of ethnobotanical knowledge is similar to that found for another *Quilombolas* community (Table 5). The high diversity of knowledge could potentially be a result of the fact that *Quilombolas* ethnobotanical knowledge includes a combination of African, Amerindian and European knowledge of plants.

The forest species used in both communities are, in general, categorized as low risk based on international (International Union for the Conservation of Nature (IUCN), and national (Biodiversitas and Ministério do Meio Ambiente—MMA) assessments (Table 6). At SSBV, *A. angustifolia* and *E. edulis* are classified as “in danger” according to Biodiversitas and “endangered” according to MMA and *M. villosum* is “vulnerable” according to IUCN. At SB, only *O. odorifera* is classified as “in danger” according to Biodiversitas and Endangered according to MMA.

Unfortunately, locally these species appear to be at much higher risk. The results of our conservation priority index show that, of the 59 species at SSBV in Table 6, 56% are classified in Category 1 (highest risk), 37% of Category 2 and 7% in Category 3. Among the 61 forest species of SB, 52% were classified in Category 1, 38% in Category 2 and 10% in Category 3. This indicates that more than 50% of the forest species are under threat and would benefit from conservation plans. Although the *Quilombolas* do not harvest plants for commercial purposes,

**Table 4. Two hundred and one native species cited as useful by the São Sebastião da Boa Vista (SSBV) and São Bento (SB) communities, in alphabetical order of botanical families, followed by vernacular name, species habit (Hab), use categories (Categ), plant part used, and voucher number.**

| Family           | Scientific name (Family)                                   | Vernacular name             |                      | Hab. | Use categories |          | Part       |    | Voucher |       |       |
|------------------|------------------------------------------------------------|-----------------------------|----------------------|------|----------------|----------|------------|----|---------|-------|-------|
|                  |                                                            | SSBV                        | SB                   |      | SSBV           | SB       | SSBV       | SB | SSBV    | SB    |       |
| Alismataceae     | <i>Echinodorus grandiflorus</i> (Cham. & Schtdl.) Micheli  | Chapéu de couro             |                      | Hb   | M              |          | Le         |    | 61724   |       |       |
| Amaranthaceae    | <i>Alternanthera brasiliana</i> (L.) Kuntze                | Amoxilina                   | Antibiótico de horta | Hb   | M              |          | Le         |    | 60495   |       |       |
|                  | <i>Dysphania ambrosioides</i> (L.) Mosyakin & Clemants     | Santa Maria                 |                      | Hb   | M              |          | Le         |    | 60489   |       |       |
| Anacardiaceae    | <i>Anacardium occidentale</i> L.                           | Cajú                        |                      | Ar   | M              |          | Le         |    |         |       |       |
|                  | <i>Schinus terebinthifolius</i> Radd                       | Aroeira                     |                      | Ar   | Fw             | Fw; T    | St         |    |         | 63310 |       |
| Annonaceae       | <i>Guatteria villosissima</i> A. St.-Hil.                  | Pindaíba                    |                      | Ar   | C; Fw          | C; Fw    | St         |    |         |       |       |
|                  | <i>Rollinia sylvatica</i> (A. St.-Hil.) Martius            | Articum                     |                      | Ar   | Fw             | C        | St         |    |         |       |       |
|                  | <i>Xylopia sericea</i> A. St.-Hill.                        | Andorinha                   |                      | Ar   | C              |          | St         |    |         |       |       |
|                  | <i>Xylopia brasiliensis</i> Spreng.                        | Pau andorinha               |                      | Ar   |                | T        |            | St |         |       |       |
| Apocynaceae      | <i>Allamanda cathartica</i> L.                             | Mate                        |                      | Sh   |                | F        | Le         |    |         |       |       |
| Araceae          | <i>Xanthosoma sagittifolium</i> (L.) Schott.               | Taioba                      |                      | Hb   | F              |          | Le         |    | 62723   | 63279 |       |
| Araucariaceae    | <i>Araucaria angustifolia</i> (Bertol.) Kuntze             | Pinheiro                    |                      | Ar   | F; T           |          | Se; St     |    |         |       |       |
| Arecaceae        | <i>Euterpe edulis</i> Mart.                                | Palmeira                    |                      | Ar   | F; T           |          | St; Le     |    |         |       |       |
| Aristolochiaceae | <i>Aristolochia</i> sp.                                    | Milihomí                    |                      | Vi   | M; R           | M; R     | E          | Le |         |       |       |
| Aspleniaceae     | <i>Asplenium</i> sp.                                       | Samambaiazinha              |                      | Hb   | O              |          |            |    | 62737   |       |       |
| Begoniaceae      | <i>Begonia</i> sp <sup>1</sup> .                           | Azedinho                    |                      | Hb   |                | O        |            |    |         |       |       |
| Bignoniaceae     | <i>Handroanthus chrysotrichus</i> (Mart. ex A. DC.) Mattos | Pau mulato                  | Ipê comum            | Ar   | T              | Fw       | St         |    | 62972   |       |       |
|                  | <i>Jacaranda caroba</i> (Vell.) DC.                        | Carobinha                   |                      | Ar   | Fw; T          |          | St         |    |         | 63274 |       |
|                  | <i>Pyrostegia venusta</i> (Ker Gawl.) Miers                | Cipó São João               |                      | Vi   | R              | T        | Le         | E  | 63301   |       |       |
|                  | <i>Sparattosperma leucanthum</i> (Vell.) K. Schum.         | Cinco folhas                |                      | Ar   | M; Fw          | M; Fw; R | St; Le     |    |         | 63309 |       |
|                  | <i>Zeyheria tuberculosa</i> (Vell.) Bureau ex Verl.        | Ipê graúdo                  |                      | Ar   |                | Fw       | St         |    |         |       |       |
| Bixaceae         | <i>Bixa orellana</i> L.                                    | Urucum                      | Aricum               | Ar   | M; F           | M        | Se         |    | 62727   |       |       |
| Boraginaceae     | <i>Tournefortia paniculata</i> Cham.                       | Marmelinho                  |                      | Hb   | M              |          | Le; Fl     | Fl |         |       |       |
| Brassicaceae     | <i>Brassica rapa</i> L.                                    | Mostarda                    |                      | Hb   |                | F        |            | Le |         |       |       |
| Cactaceae        | <i>Rhipsalis clavata</i> F.A.C. Weber                      | Chuveiro                    |                      | Hb   |                | O        |            |    |         |       |       |
|                  | <i>Schlumbergera truncata</i> (Haw.) Moran                 | Flor de maio                |                      | Hb   | O              | M; O     |            | E  | 62743   |       |       |
| Campanulaceae    | <i>Lobelia fistulosa</i> Vell.                             | Rabo de onça                |                      | Hb   | M              |          | Fl; St; Le |    |         |       |       |
| Cannaceae        | <i>Canna indica</i> L.                                     | Bananeirinha                | Imbirí de flor       | Hb   | O              |          |            |    | 62722   | 62997 |       |
| Compositae       | <i>Achyrocline satureioides</i> (Lam.) DC.                 | Marcela do campo            |                      | Hb   | T              |          | Fl         |    | 62794   |       |       |
|                  | <i>Ageratum conyzoides</i> (L.) L.                         | Erva de São João            |                      | Hb   | M              |          | Le; Ro     | Le | 60457   |       |       |
|                  | <i>Baccharis coridifolia</i> DC.                           | Alecrim do mato             |                      | Hb   | R              |          | Le         |    | 62790   |       |       |
|                  | <i>Baccharis pingraea</i> DC.                              | Santarina                   |                      | Hb   |                | M        |            | Le |         |       |       |
|                  | <i>Bidens pilosa</i> L.                                    | Picão                       |                      | Hb   | M              |          | Le         |    | 60532   | 63242 |       |
|                  | <i>Cissampelos pareira</i> L.                              | Abuta branca                |                      | Vi   |                | M        |            | Le |         |       |       |
|                  | <i>Eremanthus erythropappus</i> (DC.) MacLeish.            | Candeia                     |                      | Ar   | C; Fw; T       | C; T     | St         |    | 62976   |       |       |
|                  | <i>Gochnatia polymorpha</i> (Less) Cabrera                 | Camará                      |                      | Ar   | C; T           |          | St         |    | 62740   |       |       |
|                  | <i>Mikania glomerata</i> Spreng                            | Guaco                       |                      | Hb   |                | M        |            | Le |         |       |       |
|                  | <i>Mikania hirsutissima</i> var. <i>ursina</i> Baker       | Cipó cabeludo               |                      | Vi   | R              | M        | E          | Le | 62969   |       |       |
|                  | <i>Mikania cordifolia</i> (L.f.) Willd.                    | Cipó coração de Jesus       |                      | Vi   | Fw             |          | E          |    | 62775   |       |       |
|                  | <i>Piptocarpha axillaris</i> (Less.) Baker                 | Branda fogo                 |                      | Ar   | R; T           |          | Le; St     |    |         |       |       |
|                  | <i>Solidago chilensis</i> Meyen                            | Arnica                      |                      | Hb   | M              |          | Le         |    | 62459   |       |       |
|                  | Davalliaceae                                               | <i>Davallia</i> sp.         | Samambaia            |      | Hb             | O        |            |    |         | 62749 |       |
|                  | Dilleniaceae                                               | <i>Davilla rugosa</i> Poir. | Cipó-caboclo         |      | Vi             | R        | R; T       | E  |         | 62791 | 63292 |
|                  | Dioscoreaceae                                              | <i>Dioscorea</i> sp.        | Inhame               |      | Hb             | M        | F          | Ro |         |       |       |
| Euphorbiaceae    | <i>Croton urucurana</i> Baill.                             | Adrago                      |                      | Ar   | C; Fw          | Fw       | St; Le     | St | 62793   | 62998 |       |
|                  | <i>Manihot esculenta</i> Crantz                            | Mandioca                    |                      | Hb   | F              |          | Ro         |    | 62721   | 62996 |       |
|                  | <i>Maprounea guianensis</i> Aubl.                          | Santa Luzia                 |                      | Ar   | Fw; T          |          | St         |    |         |       |       |
|                  | <i>Sapium glandulosum</i> (L.) Morong                      | Leiteira                    |                      | Ar   | M              | C        | St         |    |         |       |       |
| Hypericaceae     | <i>Vismia brasiliensis</i> Choisy                          | Ruão                        |                      | Ar   | C; T           | T        | E          | St | 62783   |       |       |

(Continued)

Table 4. (Continued)

| Family                                   | Scientific name (Family)                                      | Vernacular name             |              | Hab.     | Use categories |          | Part       |        | Voucher |       |
|------------------------------------------|---------------------------------------------------------------|-----------------------------|--------------|----------|----------------|----------|------------|--------|---------|-------|
|                                          |                                                               | SSBV                        | SB           |          | SSBV           | SB       | SSBV       | SB     | SSBV    | SB    |
| Lamiaceae                                | <i>Aegiphila sellowiana</i> Cham.                             | Papagaio                    |              | Ar       | Fw             |          | St         |        | 62984   | 63312 |
|                                          | <i>Aegiphila</i> sp.                                          | Papagaio pequeno            |              | Ar       | Fw             |          | St         |        | 62975   |       |
|                                          | <i>Hyptidendron asperrimum</i> (Epling) Harley                | Cinzeiro                    |              | Ar       | Fw             |          | St         |        |         |       |
|                                          | <i>Peltodon radicans</i> Pohl.                                | Hortelã do mato             |              | Hb       | M              |          | Le         |        | 60479   | 63258 |
|                                          | <i>Salvia splendens</i> Sellow ex Wied-Neuw.                  | Sirigaita                   |              | Hb       |                | O        |            |        |         | 62992 |
| Lauraceae                                | <i>Endlicheria paniculata</i> (Spreng.) J.F.Macbr.            | Capoeira branca             |              | Ar       | Fw             |          | St         |        | 62784   |       |
|                                          | <i>Nectandra oppositifolia</i> Nees & Mart.                   | Canela branca               | Canela       | Ar       | C; Fw          |          | St         |        | 62782   |       |
|                                          | <i>Ocotea odorifera</i> (Vell.) Rohwer                        | Sassafras                   |              | Ar       |                | Fw       |            | St     |         |       |
|                                          | <i>Ocotea puberula</i> (Rich.) Nees                           | Canela de rego              |              | Ar       | C; T           |          | St         |        |         |       |
|                                          | <i>Ocotea</i> sp.                                             | Canela vermelha             |              | Ar       |                | Fw; T    |            | St     |         |       |
| Leguminosae                              | <i>Andira anthelmia</i> (Vell.) J.F.Macbr.                    | Limpeza do mundo            |              | Ar       | R              |          | St; Le     |        | 61713   |       |
|                                          | <i>Dalbergia hortensis</i> Heringer & al.                     | Endireita mundo             |              | Ar       | M; C; R; T     | T        | St; Le; Fl |        | 65415   | 65390 |
|                                          | <i>Machaerium isadelphum</i> (E.Mey.) Standl.                 | Muchoco                     |              | Ar       | T              |          | St         |        | 62731   |       |
|                                          | <i>Machaerium nyctitans</i> Benth (Vell.)                     | Bico de pato                |              | Ar       | Fw             | T        | St         |        | 63306   | 63265 |
|                                          | <i>Machaerium</i> sp.                                         | Angú seco                   |              | Ar       | T              |          | St         |        |         |       |
|                                          | <i>Machaerium villosum</i> Vogel                              | Jacarándá roxo              |              | Ar       | T              |          | St         |        |         |       |
|                                          | <i>Machaerium dimorphandrum</i> Hoehne                        | Angú-seco                   |              | Ar       |                | T        |            | St     |         |       |
|                                          | <i>Machaerium scleroxylon</i> Tul.                            | Caveiúna                    |              | Ar       |                | C; Fw    |            | St     |         |       |
|                                          | <i>Piptadenia gonoacantha</i> (Mart.) J.F.Macbr.              | Pau jacaré, Jacaré          |              | Ar       | C; Fw; T       | Fw; T    | St         |        | 62789   | 63287 |
|                                          | <i>Platypodium elegans</i> Vogel                              | Jacarándá branco            |              | Ar       | T              |          | St         |        | 62778   |       |
|                                          | <i>Senna macranthera</i> (Collad.) H.S.Irwin & Barneby        | Pau de cachimbo             |              | Ar       | C; T           | O; T     | St         |        | 62751   | 62989 |
| <i>Stryphnodendron polyphyllum</i> Mart. | Barbatimão                                                    |                             | Ar           | M; Fw; R | M; Fw; R; T    | St; Ba   | St; Ba; Le | 60520  |         |       |
| Lygodiaceae                              | <i>Lygodium volubile</i> SW.                                  | Segue caminho               | Abre caminho | Hb       | O; R           | R        | E          |        | 62738   | 63291 |
| Lythraceae                               | <i>Cuphea</i> sp.                                             | Vassoura canela de saracura |              | Hb       |                | R; T     | E          |        |         | 63302 |
| Cyatheaceae                              | <i>Cyathea</i> sp.                                            | Samambaiaçú                 |              | Ar       | M; O; T        | T        | E          | St; Le | 62776   | 63280 |
|                                          | <i>Cyathea</i> sp. <sup>1</sup>                               | Samambaia                   |              | Hb       |                | O        |            |        |         | 63025 |
| Malpighiaceae                            | <i>Malpighia glabra</i> L.                                    | Acerola                     |              | Ar       | M; F           | F        | Fr         |        |         |       |
| Malvaceae                                | <i>Luehea divaricata</i> Mart.                                | Açoita cavalo               |              | Ar       | M; R           |          | Le         |        | 62980   |       |
|                                          | <i>Pseudobombax</i> sp.                                       | Imbira                      |              | Ar       |                | F; T     |            | Fr; Se |         |       |
|                                          | <i>Sida acuta</i> Burm.f.                                     | Vassoura babosa             |              | Hb       | M; O; R; T     |          | E          |        | 62745   |       |
|                                          | <i>Sida rhombifolia</i> L.                                    | Vassoura                    |              | Hb       |                | T        | E          |        |         | 63002 |
| Melastomataceae                          | <i>Leandra nianga</i> Cogn.                                   | Quaresminha                 |              | Ar       |                | O; Fw    | E          |        |         |       |
|                                          | <i>Leandra sericea</i> DC.                                    | Quaresmeirinha              |              | Ar       |                | T        | St         |        |         |       |
|                                          | <i>Leandra</i> sp.                                            | Quaresminha                 |              | Ar       | Fw             |          | St         |        |         |       |
|                                          | <i>Miconia albicans</i> (Sw.) Steud.                          | Quaresminha                 |              | Ar       |                | O; Fw    | E          |        |         |       |
|                                          | <i>Miconia cinnamomifolia</i> (DC.) Naudin                    | Murici                      |              | Ar       | C; Fw          | C; Fw; T | St         |        |         |       |
|                                          | <i>Miconia</i> sp.                                            | Zumbi                       |              | Ar       |                | C; Fw; T | St         |        |         |       |
|                                          | <i>Miconia</i> sp. <sup>1</sup>                               | Murici cabeça de boi        |              | Ar       |                | C; Fw    | St         |        |         |       |
|                                          | <i>Miconia</i> sp. <sup>2</sup>                               | Zumbi                       |              | Ar       |                | Fw; T    | St         |        |         |       |
|                                          | <i>Miconia cubatanensis</i> Hoehne                            | Zumbi                       | Carvãozin    | Ar       | Fw             | T        | St         |        | 62785   | 63257 |
|                                          | <i>Tibouchina granulosa</i> (Desr.) Cogn.                     | Chorão                      |              | Ar       | C; Fw; T       | T        | St         |        | 62788   |       |
|                                          | <i>Tibouchina semidecandra</i> (Mart. & Schrank ex DC.) Cogn. | Quaresminha                 |              | Ar       |                | O        |            |        |         |       |
| Meliaceae                                | <i>Cabralea canjerana</i> (Vell.) Mart                        | Tento                       |              | Ar       | T              |          | St         |        |         |       |
|                                          | <i>Cedrela fissilis</i> Vell.                                 | Cedro                       |              | Ar       | C; T           | C        | St         |        |         |       |
| Myrtaceae                                | <i>Eugenia uniflora</i> L.                                    | Pitanga                     |              | Ar       | F              |          | Fr         |        | 63269   | 63271 |
|                                          | <i>Myrcia guianensis</i> (Aubl.) DC.                          | Goiabinha                   |              | Ar       | F              |          | Fr         |        |         |       |
|                                          | <i>Myrcia perforata</i> O.Berg                                | Gumirim                     |              | Ar       |                | C; Fw; T | St         |        |         |       |
|                                          | <i>Myrcia splendens</i> (Sw.) DC.                             | Gumirim                     |              | Ar       | C; Fw          | C; Fw; T | St         |        | 63266   |       |
|                                          | <i>Psidium cattleianum</i> Afzel. ex Sabine                   | Araça miúdo                 |              | Ar       | M; F           |          | Fr         |        | 62781   |       |
| <i>Psidium guineense</i> SW.             | Goiaba                                                        |                             | Ar           | F        |                | Fr       |            | 62757  |         |       |
| Nephrolepidaceae                         | <i>Nephrolepis</i> sp.                                        | Samambaia                   |              | Hb       | O              |          |            |        | 62746   |       |
| Passifloraceae                           | <i>Passiflora edulis</i> Sims                                 | Maracujá                    |              | Vi       | F; M           |          | Fr         |        |         |       |
|                                          | <i>Passiflora</i> sp.                                         | Maracujá                    |              | Vi       | F              |          | Fr         |        | 62786   |       |

(Continued)

Table 4. (Continued)

| Family           | Scientific name (Family)                                                     | Vernacular name           |    | Hab. | Use categories |          | Part |        | Voucher |       |
|------------------|------------------------------------------------------------------------------|---------------------------|----|------|----------------|----------|------|--------|---------|-------|
|                  |                                                                              | SSBV                      | SB |      | SSBV           | SB       | SSBV | SB     | SSBV    | SB    |
| Phyllanthaceae   | <i>Phyllanthus tenellus</i> Roxb.                                            | Quebra pedra              |    | Hb   | M              |          | Le   | E      | 60531   | 63243 |
| Piperaceae       | <i>Peperomia glabella</i> (Sw.) A.Dietr.                                     | Rabo de rato              |    | Hb   | O              |          |      |        | 62761   |       |
|                  | <i>Piper arboreum</i> Aubl                                                   | Jarabandí grande          |    | Ar   |                | M        |      | Ro     |         | 63004 |
|                  | <i>Piper miquelianum</i> C. DC.                                              | Jarabandí                 |    | Sh   |                | M        |      | Ro     |         | 63284 |
|                  | <i>Piper</i> sp.                                                             | Jarabandí graúdo          |    | Ar   |                | M        |      | Ro     |         | 63299 |
|                  | <i>Piper umbellatum</i> L.                                                   | Capeva                    |    | Hb   |                | M; R     | Le   | E      | 62970   | 63009 |
| Plantaginaceae   | <i>Scoparia dulcis</i> L.                                                    | Vassoura de Nossa Senhora |    | Hb   | T              | M        | E    | Le     |         |       |
| Poaceae          | <i>Imperata brasiliensis</i> Trin.                                           | Sapê                      |    | Hb   | C; T           |          | E    |        |         |       |
|                  | <i>Merostachys</i> sp.                                                       | Taquarinha                |    | Hb   |                | T        |      | St     |         |       |
|                  | <i>Merostachys</i> sp <sup>1</sup> .                                         | Taquara                   |    | Hb   | O; C; Fw; T    | C        |      | St     |         |       |
| Polygonaceae     | <i>Polygala paniculata</i> L.                                                | Vassourinha de benzer     |    | Hb   |                | R        |      | Le     |         |       |
| Polypodiaceae    | <i>Phlebodium decumanum</i> (Willd.) J.Sm.                                   | Samambaia chorona         |    | Hb   | O              |          |      |        | 62733   |       |
| Primulaceae      | <i>Myrsine guianensis</i> (Aubl.) Kuntze                                     | Pororoca                  |    | Ar   | C; Fw          | Fw       |      | St     | 62773   | 62994 |
| Pteridaceae      | <i>Adiantum</i> sp.                                                          | Avenca                    |    | Hb   | M; O           |          |      |        | 62735   |       |
| Rosaceae         | <i>Rubus rosifolius</i> SM                                                   | Amora do mato             |    | Hb   | F              |          |      | Fr     | 62772   | 62986 |
| Rubiaceae        | <i>Galianthe brasiliensis</i> (Spreng.) E.L. Cabral & Bacigalupo             | Vassoura cabelo de nega   |    | Hb   |                | T        |      | E      |         |       |
|                  | <i>Richardia brasiliensis</i> Gomes                                          | Puaia                     |    | Hb   | M              |          | Le   |        | 62460   |       |
| Rutaceae         | <i>Zanthoxylum rhoifolium</i> Lam.                                           | Mamica de porca           |    | Ar   | Fw             | C; Fw; T |      | St     |         |       |
| Salicaceae       | <i>Casearia arborea</i> (Rich.) Urb.                                         | Canela de veado           |    | Ar   | T              |          |      | St     | 63268   |       |
|                  | <i>Casearia lasiophylla</i> Eichler                                          | Canela de veado           |    | Ar   |                | O; T     |      | St     |         | 63307 |
|                  | <i>Casearia sylvestris</i> Sw.                                               | Erva lagarto              |    | Ar   | M              | M; R     |      | Le     | 60455   | 63241 |
| Sapindaceae      | <i>Cupania ludowigii</i> Somner & Ferrucci                                   | Camboatá                  |    | Ar   | C              |          |      | St     | 62977   |       |
|                  | <i>Cupania vernalis</i> Cambess.                                             | Canjerona                 |    | Ar   |                | T        |      | St     |         |       |
| Scrophulariaceae | <i>Buddleja stachyoides</i> Cham. & Schlttdl.                                | Barbaço                   |    | Hb   |                | M        |      | Le     | 60491   | 63276 |
| Siparunaceae     | <i>Siparuna brasiliensis</i> (Spreng.) A. DC.                                | Limãozinho                |    | Ar   |                | R        |      | Le     | 62979   |       |
|                  | <i>Siparuna guianensis</i> Aubl.                                             | Negra mina                |    | Ar   | R              | M; R     |      | Le     | 63008   |       |
| Solanaceae       | <i>Acnistus arborescens</i> (L.) Schlttdl.                                   | Maria neira               |    | Ar   |                | Fw; R    |      | St; Le |         | 63273 |
|                  | <i>Aureliana tomentosa</i> Sendtn.                                           | Pau canjenga              |    | Ar   |                | R        |      | E      |         |       |
|                  | <i>Capsicum baccatum</i> var. <i>praetermissum</i> (Heiser & P.G. Sm.) Hunz. | Pimenta                   |    | Hb   |                | F        |      | Fr     | 62744   |       |
|                  | <i>Solanum americanum</i> Mill.                                              | Erva moura                |    | Hb   |                | M        |      | Le     | 60513   | 63262 |
|                  | <i>Solanum cernuum</i> Vell.                                                 | Panacéia                  |    | Sh   | M              |          |      | Le     | 60534   |       |
|                  | <i>Solanum lycocarpum</i> A. St.-Hil.                                        | Fruta de lobo             |    | Sh   | M              | F        |      | Fr     | 60473   | 63012 |
|                  | <i>Solanum paniculatum</i> L.                                                | Jurubeba                  |    | Hb   |                | M        |      | Le     |         |       |
| Urticaceae       | <i>Cecropia glaziovii</i> Sneath.                                            | Imbaúba                   |    | Ar   |                | C; T     |      | St     | 62787   | 63267 |
| Verbenaceae      | <i>Duranta erecta</i> L.                                                     | Pingo de ouro             |    | Sh   | M; O           | O        | E    |        | 62750   | 62990 |
|                  | <i>Lippia alba</i> (Mill.) N.E. Br. ex Britton & P. Wilson                   | Erva cidreira             |    | Sh   |                | M        |      | Le     | 60466   |       |
| Zingiberaceae    | <i>Hedychium coronarium</i> J.Koenig                                         | Imbirí                    |    | Hb   | O              |          |      |        | 62777   |       |

(Ar) = arboreal, (Sh) = shrub, (Hb) = herb, (Vi) = vine, (F) = food, (C) = construction, (Fw) = fuelwood, (M) = medicinal, (O) = ornamental, (R) = ritualistic, (T) = technological, (Le) = leaves, (Fl) = flowers, (Fr) = fruits, (Ba) = bark, (St) = stem, (Se) = seeds, (Ro) = roots, (E) = entire.

<https://doi.org/10.1371/journal.pone.0187599.t004>

some of their species have high economic value. Some species in the highest category for conservation priority such as *Ocotea odorifera* and *Machaerium scleroxylon*, are used for the production of luxury furniture production and in civil construction [62]. This tends to attract harvesting by people from outside of the communities. This emphasizes the need for a management plan for the biodiversity of the region.

Another complicating factor is that among species with highest conservation priority (Category 1), 14 (23.7%) and nine (28.1%) were also of high cultural significance (values above 1) in SSBV and SB, respectively. These results show that some of the most culturally important species are also among the most vulnerable locally. Species with both high use value indices and

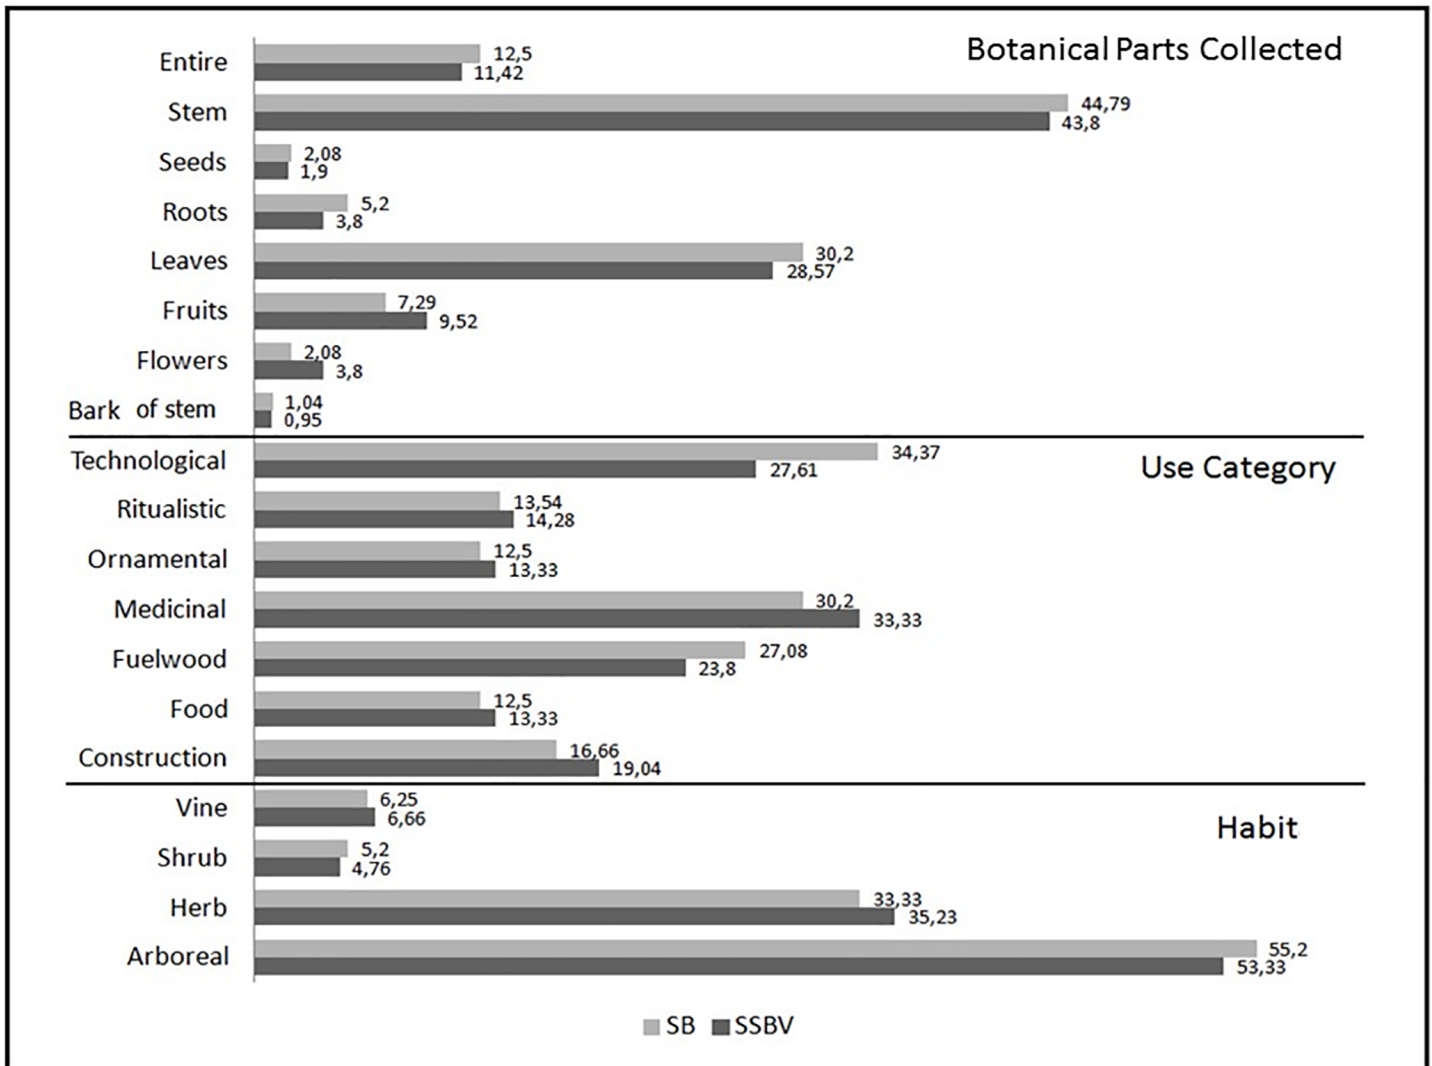

**Fig 5. Comparison of plant parts collected, use category and habit of native species of ethnobotanical importance cited in the interviews with local experts in São Sebastião da Boa Vista (SSBV) and São Bento (SB).** Values represent percentages (%) of total species reported.

<https://doi.org/10.1371/journal.pone.0187599.g005>

CSI included *Dalbergia hortensis* (26/2.14), *Eremanthus erythropappus* (6.88/1) and *Tibouchina granulosa* (6.02/1) at SSBV, and *Piptadenia gonoacantha* (3.32/1), *Sparattosperma leucanthum* (3.32/1) and *Cecropia glaziovii* (3.32/0.67) at SB.

By far the species with the highest cultural significance index (CSI) was *Dalbergia hortensis* (CSI = 26 in SSBV) (Fig 6). The use of this species in SSBV was disseminated by “Pai Tudo”. In SB, Pai Tudo was also mentioned, but only *Aureliana tomentosa* was identified to be learned from him, and it does not have a high CSI (0.96). Knowledge related to this species is considered a cultural secret [63] since it was reported by the leader of SB as having a ritualistic power capable of causing harmful effects even to oneself if handled by a non-expert.

### Forest succession stages

Of the native species identified, 85 were forest trees, including 59 in SSBV and 61 in SB. Thirty-five were common to both communities. Pioneer species predominate in SSBV, while



**Table 5. Comparison of ethnobotanical diversity indices compiled from studies of traditional communities in Brazil.**

| City/Brazilian state                  | Reference            | Type of community          | Biome                         | Comprehensiveness               | EI          | H' B. e     | N° sp.     | N° infor. | N° cit.    |
|---------------------------------------|----------------------|----------------------------|-------------------------------|---------------------------------|-------------|-------------|------------|-----------|------------|
| Barcarena/ PA                         | [48]                 | Rural                      | Amazon                        | Medicinal                       | 0.94        | 5.07        | 220        | 17        | 365        |
| Xapurí/ AC                            | [49]                 | Rural                      | Amazon                        | All useful plant species        | 0.97        | 4.80        | 145        | 14        | 1284       |
| Ubatuba/ SP                           | [38]                 | Coastal caiçara fisher-men | Atlantic Rainforest           | All useful plant species        | -           | 4.57        | 162        | 57        | 541        |
| Guaraqueçaba/PR                       | [37]                 | Rural                      | Atlantic Rainforest           | All useful plant species        | -           | 5,48        | 445        | 90        | 3400       |
| Santo Antônio do Leverger/ MT         | [50]                 | Rural                      | Pantanal                      | Medicinal                       | 0,94        | 5,09        | 228        | 48        | 938        |
| Arraial do Cabo/ RJ                   | [33]                 | Coastal caiçara fisher-men | Atlantic Rainforest           | All useful plant species        | -           | 4,1         | 68         | 15        | 444        |
| Ingaí/ MG                             | [51]                 | Urban                      | Atlantic Rainforest           | All useful plant species        | 0,76        | 4,84        | 178        | 17        | -          |
| Silva Jardim/ RJ                      | [52]                 | Rural                      | Atlantic Rainforest           | All useful plant species        | -           | 5,07        | 209        | 19        | 548        |
| Itacaré/ BA                           | [53]                 | Rural                      | Atlantic Rainforest           | Medicinal                       | 0,92        | 4,21        | 98         | 26        | 379        |
| Mogi Mirim/ SP                        | [54]                 | Urban                      | Atlantic Rainforest / Cerrado | Medicinal                       | 0,87        | 4,07        | 107        | 50        | 516        |
| Rio Negro/ AM                         | [55]                 | Caboclo river-dwellers     | Amazon                        | All useful plant species        | -           | 4,71        | 425        | 33        | 180        |
| Rio Negro/ AM                         | [55]                 | Caboclo river-dwellers     | Amazon                        | All useful plant species        | -           | 4,75        | 632        | 48        | 194        |
| Santa Leopoldina/ ES                  | [15]                 | Quilombolas                | Atlantic Rainforest           | All useful plant species        | -           | 5,12        | 188        | 11        | -          |
| Anchieta/ SC                          | [56]                 | Rural                      | Atlantic Rainforest           | All useful plant species        | 0,98        | 4,31        | 101        | 78        | 776        |
| Poxim-Açu/ SE                         | [57]                 | Rural                      | Atlantic Rainforest           | All useful plant species        | 0,73        | 3,9         | 126        | 31        | -          |
| Anastácio/ MS                         | [58]                 | Rural                      | Cerrado                       | Medicinal                       | 0,94        | 5,03        | 209        | 35        | -          |
| Ascurra/ SC                           | [47]                 | Rural                      | Atlantic Rainforest           | Medicinal                       | 0,92        | 4,23        | 109        | 42        | 314        |
| Paraty/ RJ                            | [59]                 | Coastal caiçara fisher-men | Atlantic Rainforest           | All useful plant species        | -           | 5,03        | 190        | 12        | 1341       |
| Viçosa/ MG                            | [60]                 | Rural                      | Atlantic Rainforest           | Non-conventional food plants    | 0.93        | 1.65        | 59         | 20        | 389        |
| Paracambi/RJ                          | [61]                 | Municipal Natural Park     | Atlantic Rainforest           | Random sampling                 | 0.88        | 4.7         | 210        | -         | 749        |
| <b>São Sebastião da Boa Vista/ MG</b> | <b>Present study</b> | <b>Quilombolas</b>         | <b>Atlantic Rainforest</b>    | <b>All useful plant species</b> | <b>0,96</b> | <b>5,14</b> | <b>212</b> | <b>7</b>  | <b>530</b> |
| <b>São Bento/ MG</b>                  | <b>Present study</b> | <b>Quilombolas</b>         | <b>Atlantic Rainforest</b>    | <b>All useful plant species</b> | <b>0,96</b> | <b>5,21</b> | <b>221</b> | <b>6</b>  | <b>476</b> |

(EI) = Equitability index, (H' B. e) = Shannon index base, (N° sp.) = Number of cited species, (N° infor.) = Number of informants, (N° citat.) = Number of citations.

<https://doi.org/10.1371/journal.pone.0187599.t005>

early secondary predominates in SB (Fig 7), demonstrating that the forest SSBV is in an earlier stage of regeneration than SB. This may indicate that the SB forests are relatively better preserved than those of SSBV, however, further phytosociological study is needed.

According to interviews with local experts in both communities, local forests have sharply declined in the last 50 years due to an increase in grazing lands. According to reports of SSBV, the increase in agricultural activities since the 1960s and the onset of charcoal factories in the 1970s have consumed forest native trees as the main fuel stock. In SB it was reported that historically farmer owners used to lend part of their land to *Quilombolas* in exchange of work on crop and cattle ranches. *Quilombolas* were required to cut down part of their forests to increase land for agriculture and for cattle grazing. Therefore, in the cases of species like *A. angustifolia* and *M. villosum*, where the high use coincides with high conservation threat, it is likely not just harvest but more importantly habitat destruction that is causing decline.

**Table 6. Native forest species cited as useful by the study communities (SSBV and SB), in alphabetical order of botanical species, followed by conservation priority, category, use-value, cultural significance index, risk category.**

| Species                                                 | Conservation Priority |      |          |    | Use Value |      | Cultural Significance Index |      | Risk Category |
|---------------------------------------------------------|-----------------------|------|----------|----|-----------|------|-----------------------------|------|---------------|
|                                                         | Score                 |      | Category |    | SSBV      | SB   | SSBV                        | SB   |               |
|                                                         | SSBV                  | SB   | SSBV     | SB |           |      |                             |      |               |
| <i>Acnistus arborescens</i> (L.) Schldl.                |                       | 85   |          | 1  |           | 0.32 |                             | 0.32 |               |
| <i>Aegiphila sellowiana</i> Cham.                       | 100                   | 100  | 1        | 1  | 0.42      | 0.82 | 0.86                        | 1.66 |               |
| <i>Aegiphila</i> sp.                                    | 92.5                  |      | 1        |    | 0.14      |      | 0.14                        |      |               |
| <i>Andira anthelmia</i> (Vell.) J.F.Macbr.              | 85                    |      | 1        |    | 0.85      |      | 1.72                        |      |               |
| <i>Araucaria angustifolia</i> (Bertol.) Kuntze          | 92.5                  |      | 1        |    | 0.14      |      | 0.14                        |      | ID, ED        |
| <i>Aristolochia</i> sp.                                 | 92.5                  | 100  | 1        | 1  | 0.71      | 0.67 | 1.71                        | 1.5  |               |
| <i>Aureliana tomentosa</i> Sendtn.                      |                       | 75   |          | 2  |           | 0.32 |                             | 0.96 |               |
| <i>Cabrlea canjerana</i> (Vell.) Mart                   | 62.5                  | 67.5 | 2        | 2  | 0.14      | 0.17 | 0.14                        | 0.16 |               |
| <i>Casearia arborea</i> (Rich.) Urb.                    | 92.5                  |      | 1        |    | 0.14      |      | 0.14                        |      |               |
| <i>Casearia lasiophylla</i> Eichler                     |                       | 85   |          | 1  |           | 0.32 |                             | 1.32 |               |
| <i>Casearia sylvestris</i> Sw.                          | 85                    | 62.5 | 1        | 2  | 0.42      | 0.67 | 1.72                        | 2    |               |
| <i>Cecropia glaziovii</i> Sneathl.                      | 100                   | 70   | 1        | 2  | 0.42      | 0.67 | 0.84                        | 3.32 |               |
| <i>Cedrela fissilis</i> Vell.                           | 100                   | 100  | 1        | 1  | 0.85      | 0.5  | 2.85                        | 1    |               |
| <i>Cissampelos pareira</i> L.                           |                       | 100  |          | 1  |           | 0.17 |                             | 0.32 |               |
| <i>Croton urucurana</i> Baill.                          | 100                   | 100  | 1        | 1  | 0.85      | 1    | 2.84                        | 2    |               |
| <i>Cupania ludowigii</i> Somner & Ferrucci              | 100                   |      | 1        |    | 0.28      |      | 0.56                        |      |               |
| <i>Cupania vernalis</i> Cambess.                        |                       | 100  |          | 1  |           | 0.32 |                             | 0.66 |               |
| <i>Cuphea</i> sp.                                       | 62.5                  | 75   | 2        | 2  | 0.42      | 0.32 | 0.28                        | 1.32 |               |
| <i>Cyathea</i> sp.                                      |                       | 92.5 |          | 1  |           | 0.17 |                             | 0.16 |               |
| <i>Dalbergia hortensis</i> Heringer & al.               | 100                   | 92.5 | 1        | 1  | 2.14      | 0.17 | 26                          | 1    |               |
| <i>Davilla rugosa</i> Poir.                             | 70                    | 70   | 2        | 2  | 0.42      | 0.32 | 0.86                        | 0.66 |               |
| <i>Endlicheria paniculata</i> (Spreng.) J.F.Macbr.      | 92.5                  | 100  | 1        | 1  | 0.14      | 0.32 | 0.14                        | 0.66 |               |
| <i>Eremanthus erythropappus</i> (DC.) MacLeish.         | 70                    | 100  | 2        | 1  | 1         | 0.5  | 6.88                        | 2    |               |
| <i>Euterpe edulis</i> Mart.                             | 77.5                  |      | 2        |    | 0.28      |      | 0.28                        |      | ID, ED        |
| <i>Gochnatia polymorpha</i> (Less) Cabrera              | 92.5                  |      | 1        |    | 0.28      |      | 0.14                        |      |               |
| <i>Guatteria villosissima</i> A. St.-Hil.               | 85                    | 100  | 1        | 1  | 0.57      | 0.67 | 0.56                        | 0.66 |               |
| <i>Handroanthus chrysotrichus</i> (Mart. ex DC.) Mattos | 100                   | 77.5 | 1        | 2  | 0.42      | 0.17 | 0.86                        | 0.16 |               |
| <i>Hyptidodendron asperrimum</i> (Spreng.) Harley       | 92.5                  |      | 1        |    | 0.14      |      | 0.14                        |      |               |
| <i>Jacaranda caroba</i> (Vell.) DC.                     |                       | 77.5 |          | 2  |           | 0.32 |                             | 0.32 |               |
| <i>Leandra nianga</i> Cogn.                             |                       | 92.5 |          | 1  |           | 0.32 |                             | 0.16 |               |
| <i>Leandra sericea</i> DC.                              |                       | 100  |          | 1  |           | 0.32 |                             | 0.16 |               |
| <i>Leandra</i> sp.                                      | 70                    |      | 2        |    | 0.42      |      | 0.86                        |      |               |
| <i>Lobelia fistulosa</i> Vell.                          | 77.5                  |      | 2        |    | 0.14      |      | 0.14                        |      |               |
| <i>Luehea divaricata</i> Mart.                          | 85                    |      | 1        |    | 0.57      |      | 1.12                        |      |               |
| <i>Lygodium volubile</i> Sw.                            | 85                    | 100  | 1        | 1  | 0.28      | 0.32 | 3.36                        | 0.48 |               |
| <i>Machaerium</i> sp.                                   | 70                    |      | 2        |    | 0.28      |      | 3.36                        |      |               |
| <i>Machaerium isadelphum</i> (E.Mey.) Standl.           | 77.5                  |      | 2        |    | 0.14      |      | 0.28                        |      |               |
| <i>Machaerium nyctitans</i> (Vell.) Benth.              |                       | 85   |          | 1  |           | 0.32 |                             | 0.66 |               |
| <i>Machaerium villosum</i> Vogel                        | 92.5                  |      | 1        |    | 0.14      |      | 0.28                        |      | V             |
| <i>Machaerium dimorphandrum</i> Hoehne                  |                       | 85   |          | 1  |           | 0.17 |                             | 0.32 |               |
| <i>Machaerium scleroxylon</i> Tul.                      |                       | 100  |          | 1  |           | 0.5  |                             | 0.99 |               |
| <i>Maprounea guianensis</i> Aubl.                       | 55                    |      | 3        |    | 0.85      |      | 1.72                        |      |               |
| <i>Merostachys</i> sp.                                  | 85                    | 70   | 1        | 2  | 1         | 0.17 | 2.28                        | 0.16 |               |
| <i>Miconia albicans</i> (Sw.) Steud.                    |                       | 92.5 |          | 1  |           | 0.32 |                             | 0.16 |               |
| <i>Miconia cinnamomifolia</i> (DC.) Naudin              | 85                    | 70   | 1        | 2  | 0.28      | 0.17 | 1.12                        | 0.16 |               |
| <i>Miconia cubatanensis</i> Hoene                       | 70                    | 85   | 2        | 1  | 0.42      | 0.5  | 0.56                        | 1    |               |
| <i>Miconia</i> sp.                                      |                       | 77.5 |          | 2  |           | 0.32 |                             | 0.16 |               |
| <i>Miconia</i> sp. <sup>1</sup>                         |                       | 100  |          | 1  |           | 0.5  |                             | 0.16 |               |
| <i>Mikania cordifolia</i> (L.f.) Willd                  | 77.5                  |      | 2        |    | 0.14      |      | 0.14                        |      |               |

(Continued)

Table 6. (Continued)

| Species                                                       | Conservation Priority |      |          |    | Use Value |      | Cultural Significance Index |      | Risk Category |
|---------------------------------------------------------------|-----------------------|------|----------|----|-----------|------|-----------------------------|------|---------------|
|                                                               | Score                 |      | Category |    | SSBV      | SB   | SSBV                        | SB   |               |
|                                                               | SSBV                  | SB   | SSBV     | SB |           |      |                             |      |               |
| <i>Mikania hirsutissima</i> var. <i>ursina</i> Baker          | 77.5                  | 55   | 2        | 3  | 0.14      | 0.32 | 0.14                        | 0.16 |               |
| <i>Myrcia guianensis</i> (Aubl.) DC.                          | 70                    |      | 2        |    | 0.14      |      | 0.14                        |      |               |
| <i>Myrcia perforata</i> O.Berg                                |                       | 62.5 |          | 2  |           | 0.5  |                             | 0.16 |               |
| <i>Myrcia splendens</i> (Sw.) DC.                             | 55                    | 100  | 3        | 1  | 0.71      | 1    | 0.57                        | 3    |               |
| <i>Myrsine guianensis</i> (Aubl.) Kuntze                      |                       | 85   |          | 1  |           | 0.32 |                             | 0.66 |               |
| <i>Nectandra oppositifolia</i> Nees & Mart.                   | 100                   | 85   | 1        | 1  | 1         | 1    | 1.14                        | 0.32 |               |
| <i>Ocotea odorifera</i> (Vell.) Rohwer                        |                       | 77.5 |          | 2  |           | 0.17 |                             | 0.32 | VU, ED        |
| <i>Ocotea</i> sp.                                             |                       | 92.5 |          | 1  |           | 0.17 |                             | 0.32 |               |
| <i>Ocotea puberula</i> (Rich.) Nees                           | 100                   |      | 1        |    | 0.28      |      | 0.56                        |      |               |
| <i>Passiflora</i> sp.                                         | 70                    | 70   | 2        | 2  | 0.28      | 0.17 | 0.14                        | 0.16 |               |
| <i>Piper arboreum</i> Aubl.                                   |                       | 77.5 |          | 2  |           | 0.17 |                             | 0.16 |               |
| <i>Piper miquelianum</i> C. DC.                               | 85                    |      | 1        |    | 0.28      |      | 1.12                        |      |               |
| <i>Piper</i> sp.                                              |                       | 92.5 |          | 1  |           | 0.17 |                             | 2.5  |               |
| <i>Piper umbellatum</i> L.                                    | 77.5                  | 92.5 | 2        | 1  | 0.14      | 0.82 | 0.56                        | 0.16 |               |
| <i>Piptadenia gonoacantha</i> (Mart.) J.F. Macbr.             | 55                    | 70   | 3        | 2  | 1         | 1    | 4.3                         | 3.32 |               |
| <i>Piptocarpha axillaris</i> (Less.) Baker                    | 77.5                  |      | 2        |    | 0.14      |      | 1.12                        |      |               |
| <i>Platypodium elegans</i> Vogel                              | 85                    |      | 1        |    | 0.28      |      | 0.56                        |      |               |
| <i>Pseudobombax</i> sp.                                       |                       | 92.5 |          | 1  |           | 0.32 |                             | 0.16 |               |
| <i>Psidium cattleianum</i> Atzel. ex Sabine                   | 77.5                  |      | 2        |    | 0.28      |      | 0.56                        |      |               |
| <i>Psidium guineense</i> SW.                                  | 77.5                  |      | 2        |    | 0.28      |      | 0.56                        |      |               |
| <i>Pyrostegia venusta</i> (Ker Gawl.) Miers                   | 77.5                  | 85   | 2        | 1  | 0.14      | 0.32 | 0.14                        | 0.66 |               |
| <i>Rollinia sylvatica</i> (A. St.-Hil.) Martius               | 100                   | 92.5 | 1        | 1  | 0.28      | 0.17 | 0.56                        | 0.16 |               |
| <i>Sapium glandulosum</i> (L.) Morong                         | 85                    | 77.5 | 1        | 2  | 0.28      | 0.17 | 0.56                        | 0.16 |               |
| <i>Schinus terebinthifolia</i> Raddi                          | 92.5                  | 55   | 1        | 3  | 0.14      | 0.32 | 0.14                        | 0.66 |               |
| <i>Senna macranthera</i> (Collad.) H. S. Irwin & Barneby      | 100                   | 70   | 1        | 2  | 0.42      | 0.32 | 1.12                        | 1.98 |               |
| <i>Siparuna brasiliensis</i> (Spreng) A. DC.                  | 77.5                  | 55   | 2        | 3  | 0.42      | 0.67 | 0.86                        | 1    |               |
| <i>Siparuna guianensis</i> Aubl.                              | 70                    | 55   | 2        | 3  | 0.28      | 0.67 | 1.12                        | 1    |               |
| <i>Sparattosperma leucanthum</i> (Vell.) K. Schum.            | 85                    | 70   | 1        | 2  | 0.71      | 1    | 4.26                        | 3.32 |               |
| <i>Stryphnodendron polyphyllum</i> Mart.                      |                       | 70   |          | 2  |           | 0.17 |                             | 2    |               |
| <i>Tibouchina granulosa</i> (Desr.) Cogn.                     | 70                    | 77.5 | 2        | 2  | 1         | 0.32 | 6.02                        | 1.32 |               |
| <i>Tibouchina semidecandra</i> (Mart. & Schrank ex DC.) Cogn. |                       | 47.5 |          | 3  |           | 0.17 |                             | 0.16 |               |
| <i>Vismia brasiliensis</i> Choisy.                            | 55                    | 47.5 | 3        | 3  | 0.57      | 0.17 | 1.72                        | 0.16 |               |
| <i>Xylopia sericea</i> A. St-Hill.                            | 92.5                  |      | 1        |    | 0.14      |      | 0.14                        |      |               |
| <i>Xylopia brasiliensis</i> Spreng.                           |                       | 77.5 |          | 2  |           | 0.67 |                             | 0.16 |               |
| <i>Zanthoxylum rhoifolium</i> Lam.                            | 85                    | 77.5 | 1        | 2  | 0.42      | 0.5  | 0.86                        | 0.16 |               |
| <i>Zeyheria tuberculosa</i> (Vell.) Bureau ex Verl.           |                       | 92.5 |          | 1  |           | 0.17 |                             | 0.16 |               |

(ID) = In danger by Biodiversitas, (ED) = Endangered by Ministry of the Environment, (V) = Vulnerable by International Union for Conservation of Nature, (VU) = Vulnerable by Biodiversitas. Category 1 (Cat 1)—species with score  $\geq 85$  are of conservation priority and should not be collected if appropriate precautions are not taken; Category 2 (Cat 2)—species with score between 85 and 60 can be moderately collected; Category 3 (Cat 3)—species with score  $\leq 60$  are suitable for collection.

<https://doi.org/10.1371/journal.pone.0187599.t006>

## Conclusion

Our interviews showed that together, the two *Quilombolas* communities of SB and SSVB use 201 native species, and have ethnobotanical knowledge diversity indices of over 5.0—values that are higher than those reported for other traditional groups in Brazil. These data illustrate the rich ethnobotanical knowledge and heritage of the communities. However, our results also

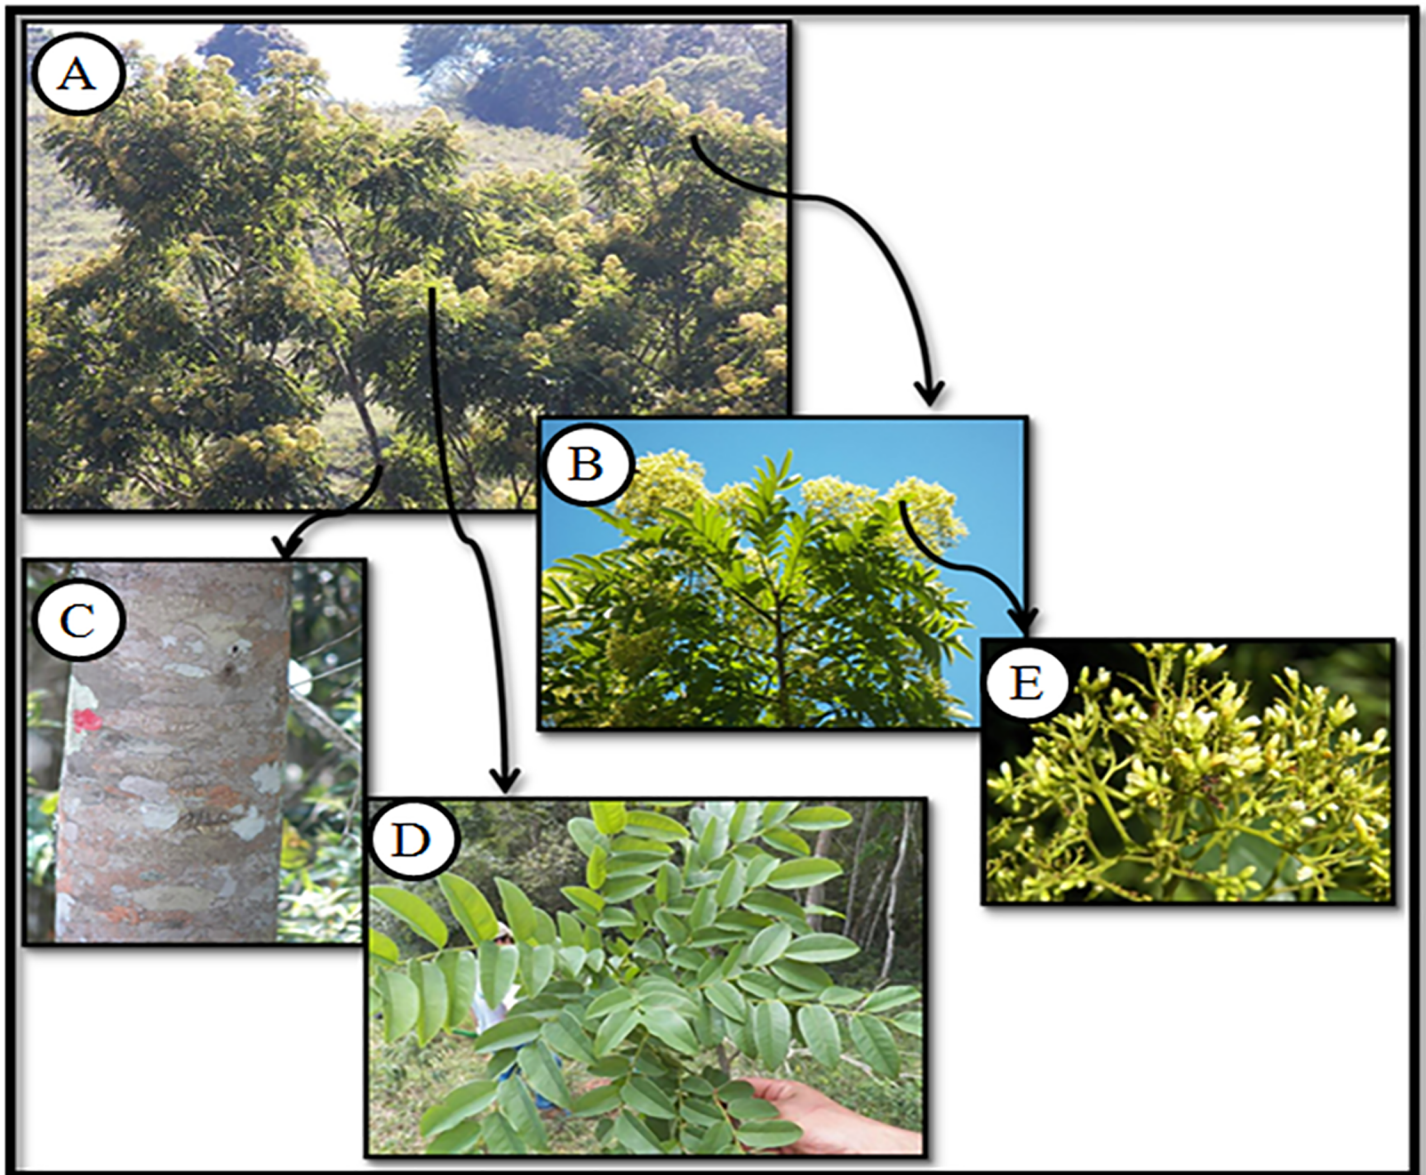

**Fig 6.** *Dalbergia hortensis* Heringer & al. (A) = Apical region with inflorescences, (B and E) = Detailed inflorescences, (C) = Detailed Stalk, (D) = detailed leaves.

<https://doi.org/10.1371/journal.pone.0187599.g006>

suggest that more than 50% of local useful species in both communities (those ranked in Category 1 for conservation priority) may be at risk if there are no plans for the management and replanting of them. Of these plants, *Dalbergia hortensis* is a special conservation priority because of its great cultural significance. Other species such *Sparattosperma leucanthum*, *Lygodium volubile* in SSBV, *Cecropia glaziovii* in SB, and *Croton urucurana* in both communities rank high for cultural significance and conservation priority. Based on our results, the development of a sustainable management plan that considers local knowledge about management and use of plants is essential. Developing programs to increase populations of those species at risk, including agroforestry programs can help meet the needs of producing culturally

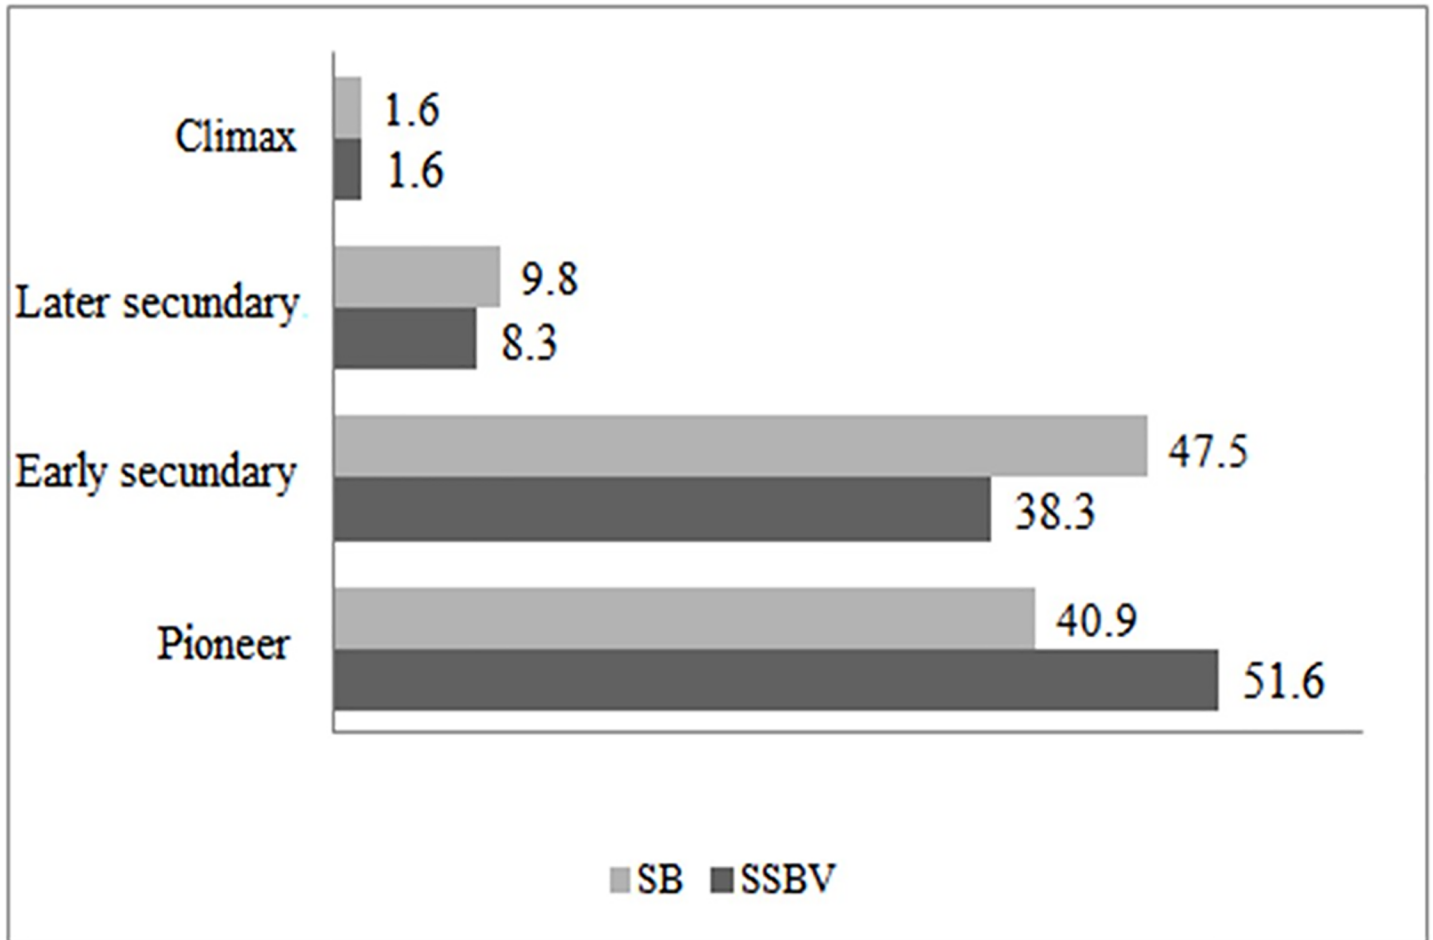

**Fig 7. Successional stages of native forest trees in São Sebastião da Boa Vista (SSBV) and São Bento (SB).** Results are expressed in percentage (%).

<https://doi.org/10.1371/journal.pone.0187599.g007>

important species and of biological conservation. It is urgent that the government demarcate *Quilombolas* land for cultural maintenance, quality of life and preservation of nature.

### Supporting information

**S1 Appendix. Permission to the conduction of this study emitted by Instituto do Patrimônio Histórico e Artístico Nacional (IPHAN).**

(PDF)

### Acknowledgments

The authors would like to thank specially to *Quilombolas* that participate in this study for all host, warmth, and hospitality; to the Programa de Pós-Graduação em Ecologia of Universidade Federal de Juiz de Fora; to Coordenação de Aperfeiçoamento Pessoal de Nível Superior (CAPES) for the Scholarship payment for BEC in the modality 1) doctorate in Brazil and 2) doctorate sandwich at the University of Hawaii at Manoa; to Conselho Nacional de Desenvolvimento Científico e Tecnológico (CNPq) for the Scholarship payment for ALM in the modality doctorate in Brazil; and to taxonomists partners Dr. Adriana Lobão (Jardim Botânico do

Rio de Janeiro), Dr. Adriano Maruyama (Universidade Estadual Paulista Júlio de Mesquita Filho) and Dr. Rodrigo Camargo (Universidade Estadual de Campinas) for valuable considerations for the identification of the species.

## Author Contributions

**Conceptualization:** Bruno Esteves Conde, Tamara Ticktin, Amanda Surerus Fonseca, Daniel Sales Pimenta.

**Data curation:** Bruno Esteves Conde, Tamara Ticktin, Amanda Surerus Fonseca.

**Formal analysis:** Bruno Esteves Conde, Tamara Ticktin, Amanda Surerus Fonseca.

**Funding acquisition:** Bruno Esteves Conde, Daniel Sales Pimenta.

**Investigation:** Bruno Esteves Conde, Amanda Surerus Fonseca.

**Methodology:** Bruno Esteves Conde, Tamara Ticktin, Amanda Surerus Fonseca, Eliana Rodrigues.

**Project administration:** Bruno Esteves Conde, Daniel Sales Pimenta.

**Resources:** Bruno Esteves Conde, Daniel Sales Pimenta.

**Software:** Bruno Esteves Conde, Amanda Surerus Fonseca, Timothy Ongaro Orsi.

**Supervision:** Bruno Esteves Conde, Tamara Ticktin.

**Validation:** Bruno Esteves Conde, Amanda Surerus Fonseca.

**Visualization:** Bruno Esteves Conde, Amanda Surerus Fonseca, Timothy Ongaro Orsi.

**Writing – original draft:** Bruno Esteves Conde, Amanda Surerus Fonseca, Daniel Sales Pimenta.

**Writing – review & editing:** Bruno Esteves Conde, Tamara Ticktin, Amanda Surerus Fonseca, Arthur Ladeira Macedo, Timothy Ongaro Orsi, Luciana Moreira Chedier, Eliana Rodrigues.

## References

1. Brazil. Biodiversidade Brasileira Brasília: Ministério do Meio Ambiente; 2017 [Available from: <http://www.mma.gov.br/biodiversidade/biodiversidade-brasileira>.
2. Hirota MM. Atlas dos remanescentes florestais da Mata Atlântica: Período 2015–2016. São Paulo: SOS Mata Atlântica; 2017.
3. da Silva SJ. Quilombolas and citizens: national projects and the right to land in Brazil. *African and Black Diaspora: An International Journal*. 2017; 10(2):143–61.
4. WWF. Leaving planet report. Gland, Switzerland: WWF; 2016. 144 p.
5. Ticktin T, Ganesan R, Paramesha M, Setty S. Disentangling the effects of multiple anthropogenic drivers on the decline of two tropical dry forest trees. *J Appl Ecol*. 2012; 49:774–84.
6. Diegues AC, Viana VM. Comunidades tradicionais e manejo dos recursos naturais da Mata Atlântica. São Paulo, Brazil: NUPAUB; 2000.
7. Guerrón Montero CM. “To Preserve is to Resist”: Threading Black Cultural Heritage from within in Quilombo Tourism. *Souls*. 2017; 19(1):75–90.
8. Berkes F. Rethinking community-based conservation. *Conserv Biol*. 2004; 18:621–30.
9. Prado HM, Murrieta RSS. A etnoecologia em perspectiva: Origens, interfaces e correntes atuais de um campo em ascensão. *Ambiente & Sociedade*. 2015; 18:139–60.
10. Austin-Ragosta S. Historical influences on the development of indigenous Jamaican Maroon Ethno-medicine: Comparisons with West African and Arawak Ethnopharmacopoeia. *J Pan Afr Stud*. 2012; 5(1):278–80.

11. Hoffman B. Drums and arrows: ethnobotanical classification and use of tropical forest plants by a Maroon and Amerindian community in Suriname, with implications for biocultural conservation [Thesis]. Honolulu: University of Hawai'i at Manoa; 2009.
12. Ticktin T, Spoon J. Ethnobiology and Conservation, in Ethnobiology. In: Stepp JR, editor. Encyclopedia of Life Support Systems. Oxford, UK: EOLSS Publishers; 2010.
13. Conde BE, Pimenta DS. Conhecimentos tradicionais x modernidade: enfrentando a escassez de recursos naturais no planeta. In: Brunet K, Rennó R, editors. Tropixel: as artes e as ciências. Salvador, Brazil: EDUFBA; 2015.
14. Fonseca-Kruel VS, Pereira TS. A Etnobotânica e os Jardins Botânicos. 1 ed. Recife, Brazil: Publication Group of Ecology and Applied Ethnobotany; 2009.
15. Crepaldi MOS, Peixoto AL. Use and knowledge of plants by "Quilombolas" as subsidies for conservation efforts in an area of the Atlantic Rainforest in Espírito Santo State, Brazil. *Biodivers Conserv*. 2010; 19:37–60.
16. França NP. Conservação e desenvolvimento: o caso dos quilombolas do Campinho da Independência (APA de Cairucu, Paraty, RJ) [Thesis]. São Paulo: Universidade de São Paulo; 2001.
17. Avila JvC, Zank S, Valadares KMdO, Maragno JM, Hanazaki N. The Traditional Knowledge of Quilombola About Plants: Does urbanization matter? 2015. 2015; 14:10.
18. Dzerefos CM, Witkowski ETF. Density and potential utilization of medicinal grassland plants from Abe Bailey Nature Reserve, South Africa. *Biodivers Conserv*. 2001; 10:1875–96.
19. Bernard HR. Research Methods in Cultural Anthropology. 2 ed. Newbury Park, USA: Sage Publications; 1988.
20. Albuquerque UP, Hanazaki N. Recent Developments and Case Studies in Ethnobotany. Recife, Brazil: Brazilian Society of Ethnobiology and Ethnoecology; 2010.
21. Zank S, Hanazaki N. Exploring the Links between Ethnobotany, Local Therapeutic Practices, and Protected Areas in Santa Catarina Coastline, Brazil. *J Evid Based Complementary Altern Med*. 2012; 2012 (1–15).
22. Conde BE, Rogerio ITS, Siqueira AM, Ferreira MQ, Chedier LM, Pimenta DS. Ethnopharmacology in the vicinity of the Botanical Garden of the Federal University of Juiz de Fora, Brazil. *Ethnobot Res Appl*. 2014; 12:91–111.
23. Galeano G. Forest use at the pacific coast of Choco, Colombia: a quantitative approach. *Econ Bot*. 2000; 54:258–376.
24. Pavan-Fruehauf S. Plantas medicinais de Mata Atlântica: manejo sustentado e amostragem. São Paulo, Brazil: Annablume; 2000.
25. Phillips G, Gentry AH. The useful plants of Tambopata, Peru: I. Statistical hypotheses tests with a new quantitative technique. *Econ Bot*. 1993; 47(1):15–32.
26. Flora Brasiliensis Rio de Janeiro: Instituto de Pesquisas Jardim Botânico do Rio de Janeiro 2014 [<http://floradobrasil.jbrj.gov.br/>]. Available from: <http://floradobrasil.jbrj.gov.br/>.
27. Stehmann JR, Forzza RC, Salino A, Sobral M, Da Costa DP, Kamino LHY. Plantas da Floresta Atlântica. Rio de Janeiro, Brazil: Instituto de Pesquisas Jardim Botânico do Rio de Janeiro; 2009.
28. Begossi A. Use of ecological methods in Ethnobotany: diversity index. *Econ Bot*. 1996; 50(3):280–9.
29. Hammer O, Haper DAT, Ryan PD. PAST: Paleontological Statistics Software Package for Education and Data Analysis. Oxford, UK: Palaeontologia Electronica; 2001.
30. Silva VA, Andrade LHC, Albuquerque UP. Revisiting the Cultural Significance Index: the case of the Fulni-ô in Northeastern Brazil. *Field Method*. 2006; 18(1):98–108.
31. Espírito-Santo FDB, Shimabukuro YE, Aragão LEOC, Machado ELM. Análise da composição florística e fitossociológica da floresta nacional do Tapajos com o apoio geográfico de imagens de satélites. *Acta Amazonica*. 2005; 35(2):155–73.
32. Araújo EL, Ferraz EMN. Análise da vegetação nos estudos etnobotânicos. In: Albuquerque UP, Lucena RFP, Cruz da Cunha LVF, editors. Métodos e Técnicas na Pesquisa Etnobiológica e Etnoecológica. Recife, Brazil: Publication Group of Ecology and Applied Ethnobotany; 2010.
33. Fonseca-Kruel VS, Peixoto AL. Etnobotânica na Reserva Extrativista Marinha de Arraial do Cabo, RJ, Brasil. *Acta Bot Bras*. 2004; 18(1):177–90.
34. Rossato SC, Leitão-Filho H, Begossi A. An ethnobotany of Caiçaras of the Atlantic Rainforest Coast (Brazil). *Econ Bot*. 1999; 53(4):387–95.
35. Lucena RFP, Lucena CM, Araújo EL, Alves AGC, Albuquerque UP. Conservation priorities of useful plants from different techniques of collection and analysis of ethnobotanical data. *An Acad Bras Ciênc*. 2013; 85(1):169–86. PMID: [23460442](https://pubmed.ncbi.nlm.nih.gov/23460442/)

36. Gandolfi S, Leitão Filho HF, Bezerra CLF. Levantamento florístico e caráter sucessional das espécies arbustivoarbóreas de uma floresta mesófila semidecidual no município de Guarulhos, SP. *Rev Bras Biol.* 1995; 55(4):753–67.
37. Lima RX, Silva SM, Kuniyoshi YS, Silva LB. Etnobiologia de comunidades continentais da Área de Proteção Ambiental de Guaraqueçaba, Paraná, Brasil. *Ethnoecol.* 2000; 4(6):33–55.
38. Hanazaki N, Tamashiro JY, Leitão-Filho HF, Begossi A. Diversity of plant uses in two Caíçara communities from the Atlantic Rainforest coast, Brazil. *Biodivers Conserv.* 2000; 9:597–615.
39. Silva NCB, Delfino-Regis ACS, Esquibel MA, Santos JES, Almeida MZ. Medicinal plants use in Barra II quilombola community-Bahia, Brazil. *Bol Latinoam Caribe Plant Med Aromat.* 2012; 11:435–53.
40. Thiago F. A comunidade quilombola do Cedro, Mineiros-GO: Etnobotânica e educação ambiental [Dissertation]: Universidade do Estado de Mato Grosso; 2011.
41. Santos MW. Festas quilombolas: Entre a tradição e o sagrado, matizes da ancestralidade africana. *Rev HISTEDBR.* 2013; 50:286–300.
42. Prandi R. Converter indivíduos, mudar culturas. *Tempo Social.* 2008; 20:155–72.
43. Hanazaki N, Souza VC, Rodrigues RR. Ethnobotany of rural people from the boundaries of Carlos Bento State Park, São Paulo, Brazil. *Acta Bot Bras.* 2006; 20(4):899–909.
44. Cunha LVFC, Albuquerque UP. Quantitative ethnobotany in an Atlantic Forest fragment of Northeastern Brazil—Implications to conservation. *Environmental Monitoring and Assessment.* 2006; 114(1):1–25.
45. Albuquerque UP, Andrade LHC. Conhecimento botânico tradicional e conservação em uma área de caatinga no estado de Pernambuco, Nordeste do Brasil. *Acta Bot Bras.* 2002; 16(3):273–85.
46. Oliveira RLC, Lins Neto EMF, Araújo EL, Albuquerque UP. Conservation priorities and population structure of woody medicinal plants in an area of Caatinga vegetation (Pernambuco state, NE Brazil). *Environ Monit Assess.* 2007; 132:189–206. <https://doi.org/10.1007/s10661-006-9528-7> PMID: 17279457
47. Meyer L, Quadros KE, Zeni ALB. Etnobotânica na comunidade de Santa Bárbara, Ascurra, Santa Catarina, Brasil. *Rev Bras Biociênc.* 2012; 10(3):258–66.
48. Amorozo MCM, Gély AL. Uso de plantas medicinais por caboclos do baixo Amazonas, Barcarena, PA, Brasil. *Bol Mus Para Emílio Goeldi, Série Bot.* 1988; 4(1):47–131.
49. Kainer KA, Duryea ML. Tapping women's knowledge: Plant resource use in extractive reserves, acre, Brazil. *Econ Bot.* 1992; 46(4):408–25.
50. Amorozo MCM. Uso e diversidade de plantas medicinais em Santo Antonio do Leverger, MT, Brasil. *Acta Bot Bras.* 2002; 16(2):189–203.
51. Botrel RT, Rodrigues LA, Gomes LJ, Carvalho DA, Fontes MAL. Uso da vegetação nativa pela população local no município de Ingaí, MG, Brasil. *Acta Bot Bras.* 2006; 20(1):143–56.
52. Christo AG, Guedes-Bruni RR, Silva AG. Conhecimento local em horta medicinal numa comunidade rural adjacente à Floresta Atlântica no sudeste do Brasil. *Braz J Pharmacogn.* 2010; 20(4):494–501.
53. Pinto EPP, Amorozo MCM, Furlan A. Conhecimento popular sobre plantas medicinais em comunidades rurais de mata atlântica—Itacaré, BA, Brasil. *Acta Bot Bras.* 2006; 20(4):751–62.
54. Pilla MAC, Amorozo MCM, Furlan A. Obtenção e uso das plantas medicinais no distrito de Martim Francisco, Município de Mogi-Mirim, SP, Brasil. *Acta Bot Bras.* 2006; 20(4):289–802.
55. Silva AL, Tamashiro J, Begossi A. Ethnobotany of Riverine populations from the Rio Negro, Amazonia (Brazil). *J Ethnobiol.* 2007; 27(1):46–72.
56. Vicente NR. Sistemas agroflorestais sucessionais como estratégia de uso e conservação de recursos florestais nas zonas ripárias da microbacia Arroio Primeiro de Janeiro, Anchieta—SC [Dissertation]: Universidade Federal de Santa Catarina; 2010.
57. Lima JS, Oliveira DM, Júnior JEN, Mann RS, Gomes LJ. Saberes e usos da flora madeireira por especialistas populares do agreste de Sergipe. *Sitientibus Ser Ci Biol.* 2011; 11(2):239–53.
58. Cunha SAC, Bortolotto IM. Etnobotânica de Plantas Medicinais no Assentamento Monjolinho, município de Anastácio, Mato Grosso do Sul, Brasil. *Acta Bot Bras.* 2011; 25(3):685–98.
59. Brito MR, Senna-Valle L. Diversity of plant knowledge in a “Caíçara” community from the Brazilian Atlantic Forest coast. *Acta Bot Bras.* 2012; 26(4):735–47.
60. Barreira TF, Paula Filho GX, Rodrigues VCC, Andrade FMC, Santos RHS, Priore SE, et al. Diversidade e equitabilidade de Plantas Alimentícias Não Convencionais na zona rural de Viçosa, Minas Gerais, Brasil. *Rev Bras PI Med.* 2015; 17(4):964–74.
61. Cysneiros VC, Mendonça-Junior JO, Gauí TD, Braz DM. Diversity, community structure and conservation status of an Atlantic Forest fragment in Rio de Janeiro State, Brazil. *Biota Neotropica.* 2015; 15(2):1–15.



62. Lorenzi H. *Árvores Brasileiras: manual de identificação e cultivo de plantas arbóreas nativas do Brasil*. 5 ed. Nova Odessa/SP, Brazil: Instituto Plantarum; 2008.
63. Albuquerque UP, Lucena RFP. *Métodos e técnicas na pesquisa etnobotânica*. Recife, Brazil: Livro Rápido; 2004.
